# Supplementary material
Source: PubMed Central journal article supplement (PMC2628559)

Frahm et al, Figure 1

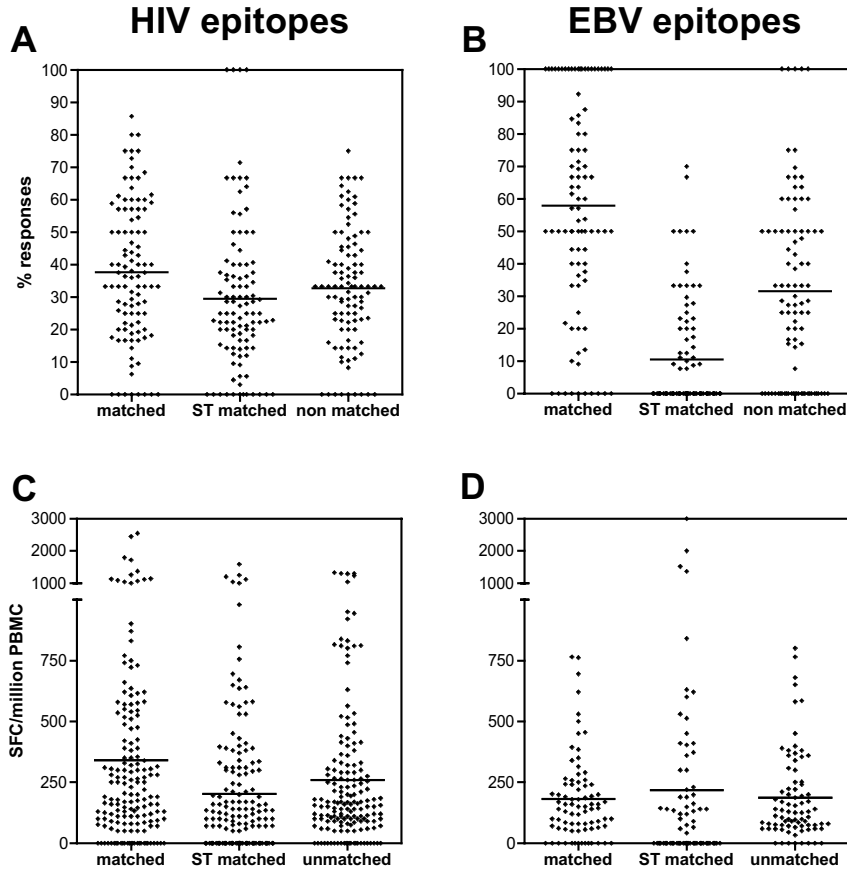

1  
2  
3  
4  
5  
6  
7  
8  
9  
10  
11  
12  
13  
14  
15  
16  
17  
18  
19  
20  
21  
22  
23  
24  
25  
26  
27  
28  
29  
30  
31  
32  
33  
34  
35  
36  
37  
38  
39  
40  
41  
42  
43  
44  
45  
46  
47  
48  
49  
50  
51  
52  
53  
54  
55  
56  
57  
58  
59  
60

**YT9 on HLA-A29**  
L8 129 (A29/68, B27/44, Cw02/16)

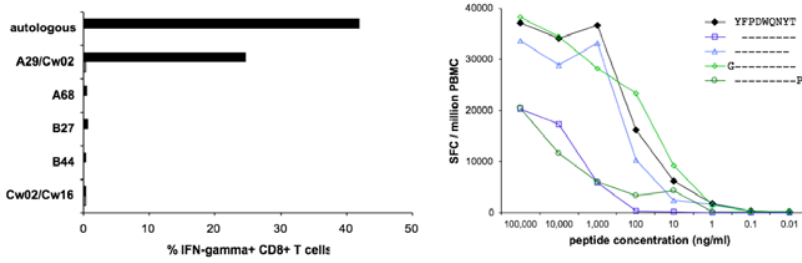

**YT9 on HLA-B35**  
F7 62 (A01/02, B07/35, Cw04/07)

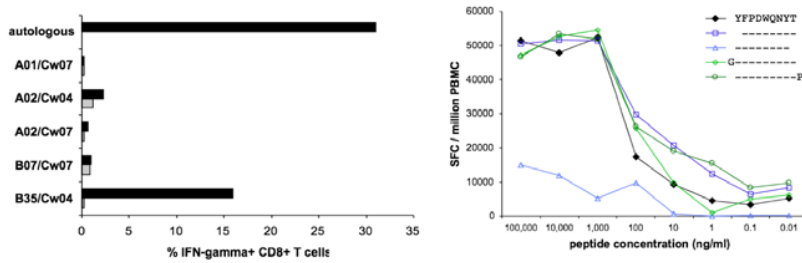

**YT9 on HLA-Cw06**  
L8117 (A01/02, B44/57, Cw05/06)

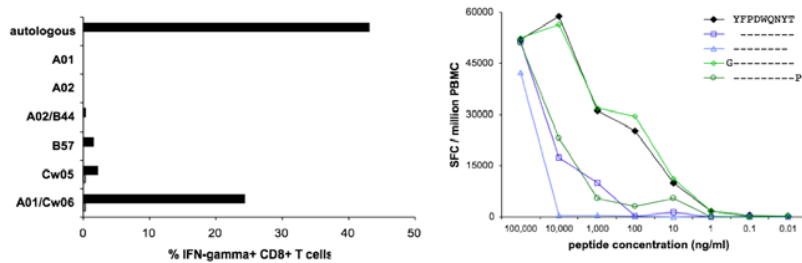

Frahm et al, Figure 3

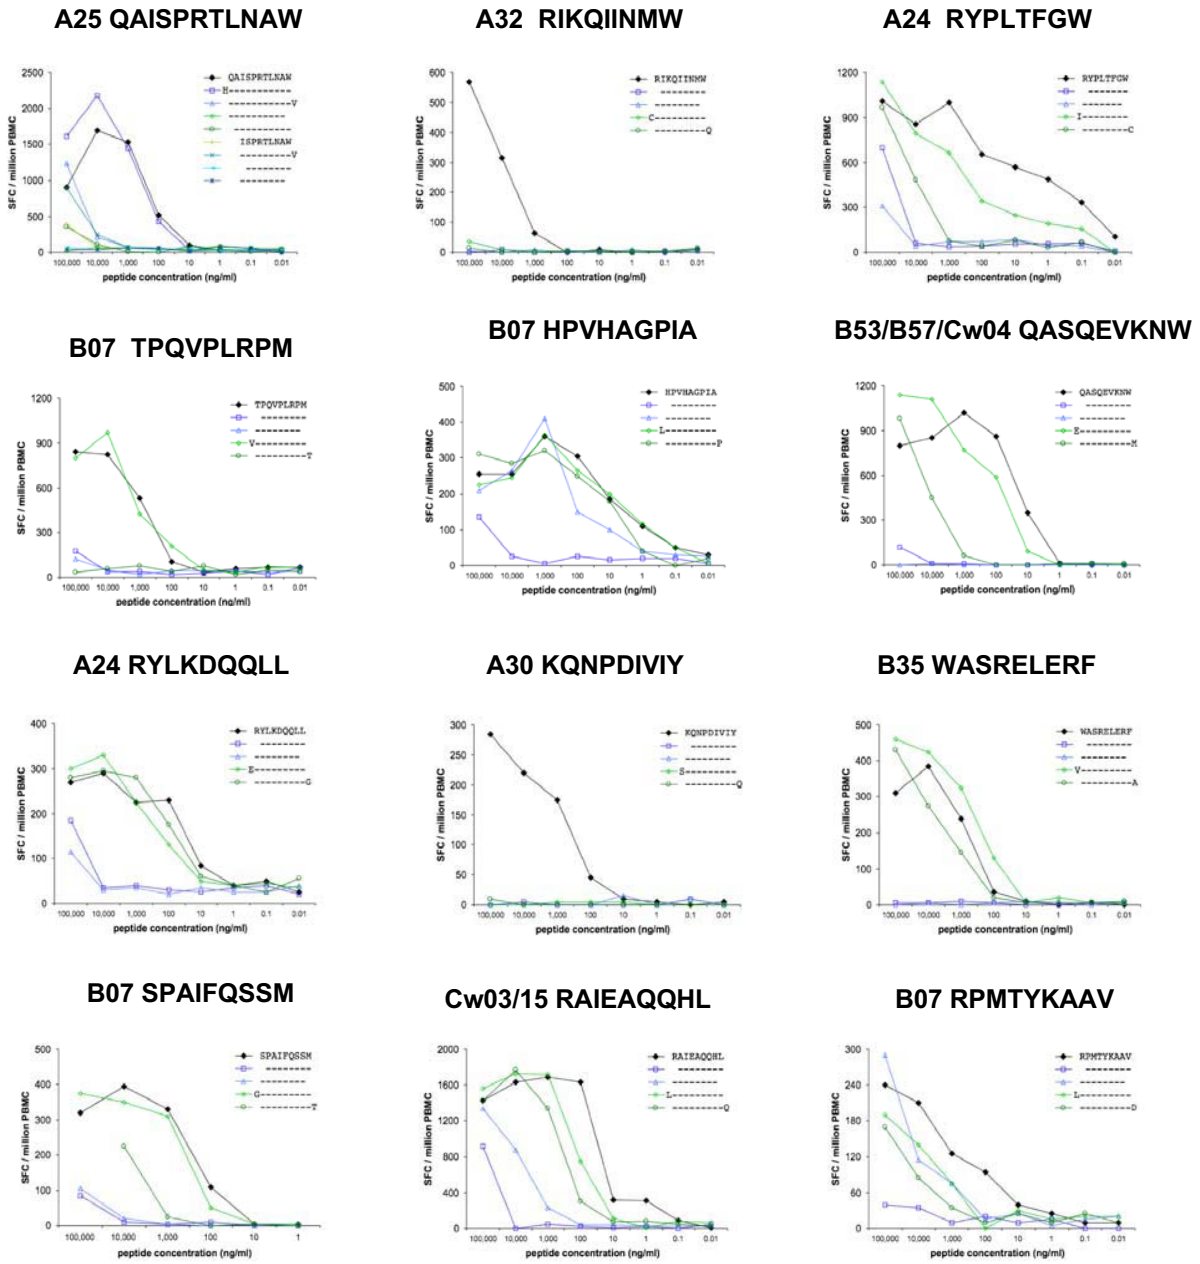

A11 IYQEPFKNLK embedded

A30 KQNPDIIVYQY embedded

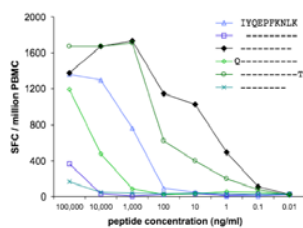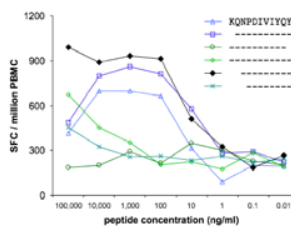

1  
2  
3  
4  
5  
6  
7  
8  
9  
10  
11  
12  
13  
14  
15  
16  
17  
18  
19  
20  
21  
22  
23  
24  
25  
26  
27  
28  
29  
30  
31  
32  
33  
34  
35  
36  
37  
38  
39  
40  
41  
42  
43  
44  
45  
46  
47  
48  
49  
50  
51  
52  
53  
54  
55  
56  
57  
58  
59  
60

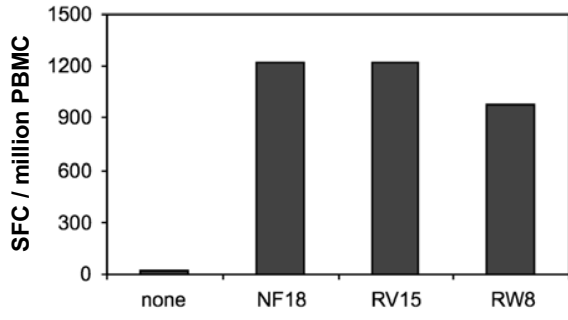

Supplement: NIHMS74257-supplement-Figures.pdf [file NIHMS74257-supplement-Figures.pdf]
