# Supplementary material
Source: PubMed Central journal article supplement (PMC2628559)
Supplement: NIHMS74257-supplement-Sup_Mat.pdf [file NIHMS74257-supplement-Sup_Mat.pdf]

## Supporting tables

**Supporting Table S1:** Expanded supertype classification of HLA-A alleles

| Allele | Supertype | Support               | Allele | Supertype | Support               | Allele | Supertype | Support               |
|--------|-----------|-----------------------|--------|-----------|-----------------------|--------|-----------|-----------------------|
| A*0101 | A01       | Binding assay         | A*0214 | A02       | Published motif       | A*0242 | A02       | Structural prediction |
| A*0102 | A01       | Structural prediction | A*0215 | A02       | Structural prediction | A*0243 | A02       | Structural prediction |
| A*0103 | A01       | Structural prediction | A*0216 | A02       | Structural prediction | A*0244 | A02       | Structural prediction |
| A*0104 | A01       | Structural prediction | A*0217 | A02       | Structural prediction | A*0245 | A02       | Structural prediction |
| A*0106 | A01       | Structural prediction | A*0218 | A02       | Structural prediction | A*0246 | A02       | Structural prediction |
| A*0107 | A01       | Structural prediction | A*0219 | A02       | Structural prediction | A*0247 | A02       | Structural prediction |
| A*0108 | A01       | Structural prediction | A*0220 | A02       | Structural prediction | A*0248 | A02       | Structural prediction |
| A*0109 | A01       | Structural prediction | A*0221 | A02       | Structural prediction | A*0249 | A02       | Structural prediction |
| A*0110 | A01       | Structural prediction | A*0222 | A02       | Structural prediction | A*0250 | A02       | Structural prediction |
| A*0111 | A01       | Structural prediction | A*0224 | A02       | Structural prediction | A*0251 | A02       | Structural prediction |
| A*0112 | A01       | Structural prediction | A*0225 | A02       | Structural prediction | A*0254 | A02       | Structural prediction |
| A*0113 | A03       | Structural prediction | A*0226 | A02       | Structural prediction | A*0256 | A02       | Structural prediction |
| A*0114 | A01       | Structural prediction | A*0227 | A02       | Structural prediction | A*0257 | A02       | Structural prediction |
| A*0115 | A01       | Structural prediction | A*0228 | A02       | Structural prediction | A*0258 | A02       | Structural prediction |
| A*0201 | A02       | Binding assay         | A*0229 | A02       | Structural prediction | A*0259 | A02       | Structural prediction |
| A*0202 | A02       | Binding assay         | A*0230 | A02       | Structural prediction | A*0260 | A02       | Structural prediction |
| A*0203 | A02       | Binding assay         | A*0231 | A02       | Structural prediction | A*0261 | A02       | Structural prediction |
| A*0204 | A02       | Published motif       | A*0232 | A02       | Structural prediction | A*0262 | A02       | Structural prediction |
| A*0205 | A02       | Binding assay         | A*0233 | A02       | Structural prediction | A*0263 | A02       | Structural prediction |
| A*0206 | A02       | Binding assay         | A*0234 | A02       | Structural prediction | A*0264 | A02       | Structural prediction |
| A*0207 | A02       | Binding assay         | A*0235 | A02       | Structural prediction | A*0266 | A02       | Structural prediction |
| A*0208 | A02       | Structural prediction | A*0236 | A02       | Structural prediction | A*0267 | A02       | Structural prediction |
| A*0209 | A02       | Structural prediction | A*0237 | A02       | Structural prediction | A*0268 | A02       | Structural prediction |
| A*0210 | A02       | Structural prediction | A*0238 | A02       | Structural prediction | A*0269 | A02       | Structural prediction |
| A*0211 | A02       | Structural prediction | A*0239 | A02       | Structural prediction | A*0270 | A02       | Structural prediction |
| A*0212 | A02       | Structural prediction | A*0240 | A02       | Structural prediction | A*0271 | A02       | Structural prediction |
| A*0213 | A02       | Structural prediction | A*0241 | A02       | Structural prediction | A*0272 | A02       | Structural prediction |
| A*0273 | A02       | Structural prediction | A*1102 | A03       | Structural prediction | A*2402 | A24       | Binding assay         |
| A*0274 | A02       | Structural prediction | A*1103 | A03       | Structural prediction | A*2403 | A24       | Structural prediction |
| A*0275 | A02       | Structural prediction | A*1104 | A03       | Structural prediction | A*2404 | A24       | Structural prediction |
| A*0276 | A02       | Structural prediction | A*1105 | A03       | Structural prediction | A*2405 | A24       | Structural prediction |
| A*0277 | A02       | Structural prediction | A*1107 | A03       | Structural prediction | A*2406 | A24       | Structural prediction |
| A*0278 | A02       | Structural prediction | A*1108 | A03       | Structural prediction | A*2407 | A24       | Structural prediction |
| A*0279 | A02       | Structural prediction | A*1109 | A03       | Structural prediction | A*2408 | A24       | Structural prediction |
| A*0281 | A02       | Structural prediction | A*1112 | A03       | Structural prediction | A*2409 | A24       | Structural prediction |
| A*0282 | A02       | Structural prediction | A*1113 | A03       | Structural prediction | A*2410 | A24       | Structural prediction |

| Allele | Supertype | Support               | Allele | Supertype | Support               | Allele | Supertype | Support               |
|--------|-----------|-----------------------|--------|-----------|-----------------------|--------|-----------|-----------------------|
| A*0283 | A02       | Structural prediction | A*1114 | A03       | Structural prediction | A*2411 | A24       | Structural prediction |
| A*0284 | A02       | Structural prediction | A*1115 | A03       | Structural prediction | A*2413 | A24       | Structural prediction |
| A*0285 | A02       | Structural prediction | A*1116 | A03       | Structural prediction | A*2414 | A24       | Structural prediction |
| A*0286 | A02       | Structural prediction | A*1117 | A01       | Structural prediction | A*2415 | A24       | Structural prediction |
| A*0301 | A03       | Binding assay         | A*1119 | A03       | Structural prediction | A*2417 | A24       | Structural prediction |
| A*0302 | A03       | Structural prediction | A*1120 | A03       | Structural prediction | A*2418 | A24       | Structural prediction |
| A*0304 | A03       | Structural prediction | A*1121 | A03       | Structural prediction | A*2420 | A24       | Structural prediction |
| A*0305 | A03       | Structural prediction | A*1122 | A03       | Structural prediction | A*2421 | A24       | Structural prediction |
| A*0306 | A03       | Structural prediction | A*1123 | A03       | Structural prediction | A*2422 | A24       | Structural prediction |
| A*0307 | A03       | Structural prediction | A*2301 | A24       | Binding assay         | A*2423 | A24       | Structural prediction |
| A*0308 | A03       | Structural prediction | A*2302 | A24       | Structural prediction | A*2425 | A24       | Structural prediction |
| A*0310 | A03       | Structural prediction | A*2303 | A24       | Structural prediction | A*2426 | A24       | Structural prediction |
| A*0311 | A03       | Structural prediction | A*2304 | A24       | Structural prediction | A*2427 | A24       | Structural prediction |
| A*0312 | A03       | Structural prediction | A*2305 | A24       | Structural prediction | A*2429 | A24       | Structural prediction |
| A*0313 | A03       | Structural prediction | A*2306 | A24       | Structural prediction | A*2430 | A24       | Structural prediction |
| A*0314 | A03       | Structural prediction | A*2307 | A24       | Structural prediction | A*2432 | A24       | Structural prediction |
| A*0315 | A03       | Structural prediction | A*2308 | A24       | Structural prediction | A*2433 | A24       | Structural prediction |
| A*0316 | A03       | Structural prediction | A*2309 | A24       | Structural prediction | A*2434 | A24       | Structural prediction |
| A*0317 | A03       | Structural prediction | A*2310 | A24       | Structural prediction | A*2435 | A24       | Structural prediction |
| A*1101 | A03       | Binding assay         | A*2312 | A24       | Structural prediction | A*2437 | A24       | Structural prediction |
| A*2438 | A24       | Structural prediction | A*2614 | A01       | Structural prediction | A*3007 | A01       | Structural prediction |
| A*2439 | A24       | Structural prediction | A*2615 | A01       | Structural prediction | A*3008 | A01**     | Structural prediction |
| A*2440 | A24       | Structural prediction | A*2616 | A01       | Structural prediction | A*3009 | A01       | Structural prediction |
| A*2441 | A24       | Structural prediction | A*2617 | A01       | Structural prediction | A*3010 | A01       | Structural prediction |
| A*2442 | A24       | Structural prediction | A*2618 | A01       | Structural prediction | A*3011 | A01**     | Structural prediction |
| A*2443 | A24       | Structural prediction | A*2619 | A01       | Structural prediction | A*3012 | A01       | Structural prediction |
| A*2446 | A24       | Structural prediction | A*2620 | A01       | Structural prediction | A*3014 | A01**     | Structural prediction |
| A*2447 | A24       | Structural prediction | A*2622 | A01       | Structural prediction | A*3015 | A01**     | Structural prediction |
| A*2448 | A24       | Structural prediction | A*2623 | A01       | Structural prediction | A*3101 | A03       | Binding assay         |
| A*2449 | A24       | Structural prediction | A*2624 | A01       | Structural prediction | A*3102 | A03       | Structural prediction |
| A*2450 | A24       | Structural prediction | A*2626 | A01       | Structural prediction | A*3103 | A03       | Structural prediction |
| A*2451 | A24       | Structural prediction | A*2901 | A01*      | Structural prediction | A*3104 | A03       | Structural prediction |
| A*2452 | A24       | Structural prediction | A*2902 | A01*      | Binding assay         | A*3105 | A03       | Structural prediction |
| A*2453 | A24       | Structural prediction | A*2903 | A01*      | Structural prediction | A*3106 | A03       | Structural prediction |
| A*2501 | A01       | Structural prediction | A*2904 | A01*      | Structural prediction | A*3107 | A01       | Structural prediction |
| A*2502 | A01       | Structural prediction | A*2905 | A01*      | Structural prediction | A*3108 | A01       | Structural prediction |
| A*2503 | A01       | Structural prediction | A*2906 | A01*      | Structural prediction | A*3109 | A03       | Structural prediction |
| A*2504 | A01       | Structural prediction | A*2907 | A01       | Structural prediction | A*3110 | A01       | Structural prediction |
| A*2601 | A01       | Binding assay         | A*2909 | A01*      | Structural prediction | A*3111 | A03       | Structural prediction |

| Allele | Supertype | Support               | Allele  | Supertype | Support               | Allele | Supertype | Support               |
|--------|-----------|-----------------------|---------|-----------|-----------------------|--------|-----------|-----------------------|
| A*2602 | A01       | Published motif       | A*2910  | A01*      | Structural prediction | A*3112 | A03       | Structural prediction |
| A*2604 | A01       | Structural prediction | A*2911  | A01*      | Structural prediction | A*3201 | A01       | Binding assay         |
| A*2605 | A01       | Structural prediction | A*2912  | A01*      | Structural prediction | A*3202 | A01       | Structural prediction |
| A*2607 | A01       | Structural prediction | A*2913  | A01*      | Structural prediction | A*3203 | A01       | Structural prediction |
| A*2608 | A01       | Structural prediction | A*2914  | A01       | Structural prediction | A*3204 | A01       | Structural prediction |
| A*2609 | A01       | Structural prediction | A*3001  | A01**     | Binding assay         | A*3205 | A01       | Structural prediction |
| A*2610 | A01       | Structural prediction | A*3002  | A01       | Binding assay         | A*3206 | A01       | Structural prediction |
| A*2611 | A01       | Structural prediction | A*3003  | A01       | Structural prediction | A*3207 | A01       | Structural prediction |
| A*2612 | A01       | Structural prediction | A*3004  | A01       | Structural prediction | A*3208 | A01       | Structural prediction |
| A*2613 | A01       | Structural prediction | A*3006  | A01       | Structural prediction | A*3209 | A01       | Structural prediction |
| A*3210 | A01       | Structural prediction | A*6601  | A03       | Published motif       | A*6822 | A03       | Structural prediction |
| A*3301 | A03       | Binding assay         | A*6602  | A03       | Published motif       | A*6823 | A03       | Structural prediction |
| A*3302 | A03       | Published motif       | A*6603  | A03       | Structural prediction | A*6824 | A03       | Structural prediction |
| A*3303 | A03       | Published motif       | A*6604  | A03       | Structural prediction | A*6825 | A03       | Structural prediction |
| A*3304 | A03       | Structural prediction | A*6801  | A03       | Binding assay         | A*6826 | A03       | Structural prediction |
| A*3305 | A03       | Structural prediction | A*68011 | A03       | Binding assay         | A*6827 | A02       | Structural prediction |
| A*3306 | A03       | Structural prediction | A*68012 | A03       | Binding assay         | A*6828 | A02       | Structural prediction |
| A*3307 | A03       | Structural prediction | A*6802  | A02       | Binding assay         | A*6901 | A02       | Published motif       |
| A*3308 | A03       | Structural prediction | A*6803  | A03       | Structural prediction | A*74   | A03       | Binding assay         |
| A*3401 | A03       | Structural prediction | A*6804  | A03       | Structural prediction | A*7401 | A03       | Structural prediction |
| A*3402 | A03       | Structural prediction | A*6808  | A03       | Structural prediction | A*7402 | A03       | Structural prediction |
| A*3403 | A03       | Structural prediction | A*6809  | A03       | Structural prediction | A*7403 | A03       | Structural prediction |
| A*3404 | A03       | Structural prediction | A*6810  | A03       | Structural prediction | A*7404 | A03       | Structural prediction |
| A*3405 | A03       | Structural prediction | A*6812  | A03       | Structural prediction | A*7405 | A03       | Structural prediction |
| A*3406 | A03       | Structural prediction | A*6813  | A03       | Structural prediction | A*7407 | A03       | Structural prediction |
| A*3601 | A01       | Structural prediction | A*6814  | A03       | Structural prediction | A*7408 | A03       | Structural prediction |
| A*3602 | A01       | Structural prediction | A*6815  | A02       | Structural prediction | A*7409 | A03       | Structural prediction |
| A*3603 | A01       | Structural prediction | A*6816  | A03       | Structural prediction | A*7410 | A03       | Structural prediction |
| A*3604 | A01       | Structural prediction | A*6819  | A03       | Structural prediction | A*7411 | A03       | Structural prediction |
| A*4301 | A01       | Structural prediction | A*6821  | A03       | Structural prediction | A*8001 | A01       | Structural prediction |

A01\*: A01 (and A24)

A01\*\*: A01 (and A03)

**Supporting Table S2:** Expanded supertype assignments for HLA-B alleles

| Allele | Supertype | Support               | Allele | Supertype | Support               | Allele | Supertype | Support               |
|--------|-----------|-----------------------|--------|-----------|-----------------------|--------|-----------|-----------------------|
| B*0702 | B07       | Binding assay         | B*0735 | B07       | Structural prediction | B*1503 | B27       | Binding assay         |
| B*0703 | B07       | Published motif       | B*0736 | B07       | Structural prediction | B*1504 | B62       | Published motif       |
| B*0704 | B07       | Published motif       | B*0737 | B07       | Structural prediction | B*1505 | B62       | Published motif       |
| B*0705 | B07       | Published motif       | B*0738 | B07       | Structural prediction | B*1506 | B62       | Structural prediction |
| B*0706 | B07       | Structural prediction | B*0739 | B07       | Structural prediction | B*1507 | B62       | Published motif       |
| B*0707 | B07       | Structural prediction | B*0740 | B07       | Structural prediction | B*1508 | B07       | Published motif       |
| B*0708 | B07       | Structural prediction | B*0741 | B07       | Structural prediction | B*1509 | B27       | Published motif       |
| B*0709 | B07       | Structural prediction | B*0742 | B07       | Structural prediction | B*1510 | B27       | Structural prediction |
| B*0711 | B07       | Structural prediction | B*0743 | B07       | Structural prediction | B*1511 | B07       | Structural prediction |
| B*0712 | B07       | Structural prediction | B*1301 | B62       | Structural prediction | B*1512 | B62       | Structural prediction |
| B*0714 | B07       | Structural prediction | B*1302 | B62       | Structural prediction | B*1513 | B62       | Published motif       |
| B*0715 | B07       | Structural prediction | B*1303 | B62       | Structural prediction | B*1514 | B62       | Structural prediction |
| B*0716 | B07       | Structural prediction | B*1304 | B62       | Structural prediction | B*1515 | B62       | Structural prediction |
| B*0717 | B07       | Structural prediction | B*1306 | B62       | Structural prediction | B*1516 | B58       | Published motif       |
| B*0718 | B07       | Structural prediction | B*1308 | B62       | Structural prediction | B*1517 | B58       | Published motif       |
| B*0719 | B07       | Structural prediction | B*1309 | B62       | Structural prediction | B*1518 | B27       | Structural prediction |
| B*0720 | B07       | Structural prediction | B*1310 | B62       | Structural prediction | B*1519 | B62       | Structural prediction |
| B*0721 | B07       | Structural prediction | B*1311 | B62       | Structural prediction | B*1520 | B62       | Published motif       |
| B*0722 | B07       | Structural prediction | B*1312 | B62       | Structural prediction | B*1523 | B27       | Structural prediction |
| B*0723 | B07       | Structural prediction | B*1313 | B62       | Structural prediction | B*1524 | B62       | Structural prediction |
| B*0724 | B07       | Structural prediction | B*1401 | B27       | Published motif       | B*1525 | B62       | Structural prediction |
| B*0725 | B07       | Structural prediction | B*1402 | B27       | Published motif       | B*1527 | B62       | Structural prediction |
| B*0726 | B07       | Structural prediction | B*1403 | B27       | Structural prediction | B*1528 | B62       | Structural prediction |
| B*0730 | B07       | Structural prediction | B*1405 | B27       | Structural prediction | B*1530 | B62       | Structural prediction |
| B*0731 | B07       | Structural prediction | B*1406 | B27       | Structural prediction | B*1531 | B62       | Structural prediction |
| B*0732 | B07       | Structural prediction | B*1407 | B27       | Structural prediction | B*1533 | B62       | Structural prediction |
| B*0733 | B07       | Structural prediction | B*1501 | B62       | Binding assay         | B*1534 | B62       | Structural prediction |
| B*0734 | B07       | Structural prediction | B*1502 | B62       | Published motif       | B*1535 | B62       | Structural prediction |
| B*1536 | B62       | Structural prediction | B*1572 | B27       | Structural prediction | B*1806 | B44       | Structural prediction |
| B*1537 | B27       | Structural prediction | B*1573 | B62       | Structural prediction | B*1809 | B44       | Structural prediction |
| B*1538 | B62       | Structural prediction | B*1574 | B27       | Structural prediction | B*1810 | B44       | Structural prediction |
| B*1539 | B62       | Structural prediction | B*1575 | B62       | Structural prediction | B*1811 | B44       | Structural prediction |
| B*1540 | B62       | Structural prediction | B*1577 | B62       | Structural prediction | B*1813 | B44       | Structural prediction |
| B*1542 | B62       | Structural prediction | B*1578 | B62       | Structural prediction | B*1814 | B44       | Structural prediction |
| B*1543 | B62       | Structural prediction | B*1580 | B27       | Structural prediction | B*1815 | B44       | Structural prediction |
| B*1545 | B62       | Structural prediction | B*1581 | B62       | Structural prediction | B*1819 | B44       | Structural prediction |
| B*1547 | B27       | Structural prediction | B*1582 | B62       | Structural prediction | B*1820 | B44       | Structural prediction |
| B*1548 | B62       | Structural prediction | B*1583 | B62       | Structural prediction | B*2701 | B27       | Structural prediction |

| Allele  | Supertype | Support               | Allele | Supertype | Support               | Allele | Supertype | Support               |
|---------|-----------|-----------------------|--------|-----------|-----------------------|--------|-----------|-----------------------|
| B*1549  | B27       | Structural prediction | B*1584 | B62       | Structural prediction | B*2702 | B27       | Published motif       |
| B*1550  | B62       | Structural prediction | B*1585 | B62       | Structural prediction | B*2703 | B27       | Published motif       |
| B*1551  | B27       | Structural prediction | B*1586 | B62       | Structural prediction | B*2704 | B27       | Published motif       |
| B*1552  | B27       | Structural prediction | B*1587 | B62       | Structural prediction | B*2705 | B27       | Binding assay         |
| B*1553  | B44       | Structural prediction | B*1588 | B62       | Structural prediction | B*2706 | B27       | Published motif       |
| B*1554  | B27       | Structural prediction | B*1589 | B62       | Structural prediction | B*2707 | B27       | Structural prediction |
| B*1555  | B62       | Structural prediction | B*1590 | B27       | Structural prediction | B*2708 | B27       | Structural prediction |
| B*1557  | B62       | Structural prediction | B*1591 | B27       | Structural prediction | B*2710 | B27       | Structural prediction |
| B*1558  | B62       | Structural prediction | B*1592 | B62       | Structural prediction | B*2711 | B27       | Structural prediction |
| B*1560  | B62       | Structural prediction | B*1593 | B27       | Structural prediction | B*2713 | B27       | Structural prediction |
| B*1561  | B27       | Structural prediction | B*1595 | B58       | Structural prediction | B*2714 | B27       | Structural prediction |
| B*1562  | B27       | Structural prediction | B*1596 | B62       | Structural prediction | B*2715 | B27       | Structural prediction |
| B*1563  | B62       | Structural prediction | B*1597 | B62       | Structural prediction | B*2717 | B27       | Structural prediction |
| B*1565  | B62       | Structural prediction | B*1598 | B27       | Structural prediction | B*2719 | B27       | Structural prediction |
| B*1567  | B58       | Structural prediction | B*1801 | B44       | Binding assay         | B*2720 | B27       | Structural prediction |
| B*1568  | B27       | Structural prediction | B*1802 | B44       | Structural prediction | B*2721 | B27       | Structural prediction |
| B*1569  | B27       | Structural prediction | B*1803 | B44       | Structural prediction | B*2724 | B27       | Structural prediction |
| B*1570  | B62       | Structural prediction | B*1804 | B44       | Structural prediction | B*2725 | B27       | Structural prediction |
| B*1571  | B62       | Structural prediction | B*1805 | B44       | Structural prediction | B*2727 | B27       | Structural prediction |
| B*2728  | B27       | Structural prediction | B*3533 | B07       | Structural prediction | B*3706 | B44       | Structural prediction |
| B*2730  | B27       | Structural prediction | B*3534 | B07       | Structural prediction | B*3709 | B44       | Structural prediction |
| B*3501  | B07       | Binding assay         | B*3535 | B07       | Structural prediction | B*3801 | B27       | Published motif       |
| B*3502  | B07       | Published motif       | B*3536 | B07       | Structural prediction | B*3802 | B27       | Published motif       |
| B*3503  | B07       | Binding assay         | B*3537 | B07       | Structural prediction | B*3803 | B27       | Structural prediction |
| B*3504  | B07       | Published motif       | B*3538 | B07       | Structural prediction | B*3804 | B27       | Structural prediction |
| B*3505  | B07       | Published motif       | B*3539 | B07       | Structural prediction | B*3805 | B27       | Structural prediction |
| B*3506  | B07       | Published motif       | B*3540 | B07       | Structural prediction | B*3808 | B27       | Structural prediction |
| B*3507  | B07       | Published motif       | B*3541 | B07       | Structural prediction | B*3809 | B27       | Structural prediction |
| B*3508  | B07       | Binding assay         | B*3542 | B07       | Structural prediction | B*3810 | B27       | Structural prediction |
| B*3509  | B07       | Structural prediction | B*3543 | B07       | Structural prediction | B*3811 | B27       | Structural prediction |
| B*35091 | B07       | Structural prediction | B*3544 | B07       | Structural prediction | B*3901 | B27       | Published motif       |
| B*35092 | B07       | Structural prediction | B*3545 | B07       | Structural prediction | B*3902 | B27       | Published motif       |
| B*3511  | B07       | Structural prediction | B*3546 | B07       | Structural prediction | B*3903 | B27       | Published motif       |
| B*3512  | B07       | Structural prediction | B*3551 | B07       | Structural prediction | B*3904 | B27       | Published motif       |
| B*3514  | B07       | Structural prediction | B*3552 | B07       | Structural prediction | B*3905 | B27       | Published motif       |
| B*3515  | B07       | Structural prediction | B*3553 | B07       | Structural prediction | B*3906 | B27       | Structural prediction |
| B*3517  | B07       | Structural prediction | B*3554 | B07       | Structural prediction | B*3907 | B27       | Structural prediction |
| B*3518  | B07       | Structural prediction | B*3555 | B07       | Structural prediction | B*3908 | B27       | Structural prediction |
| B*3521  | B07       | Structural prediction | B*3556 | B07       | Structural prediction | B*3909 | B27       | Structural prediction |

| Allele | Supertype | Support               | Allele | Supertype | Support               | Allele  | Supertype | Support               |
|--------|-----------|-----------------------|--------|-----------|-----------------------|---------|-----------|-----------------------|
| B*3522 | B07       | Structural prediction | B*3557 | B07       | Structural prediction | B*3910  | B07       | Structural prediction |
| B*3523 | B07       | Structural prediction | B*3558 | B07       | Structural prediction | B*3911  | B27       | Structural prediction |
| B*3524 | B07       | Structural prediction | B*3560 | B07       | Structural prediction | B*3912  | B27       | Structural prediction |
| B*3527 | B07       | Structural prediction | B*3561 | B07       | Structural prediction | B*3913  | B27       | Structural prediction |
| B*3528 | B62       | Structural prediction | B*3701 | B44       | Published motif       | B*3914  | B27       | Structural prediction |
| B*3529 | B07       | Structural prediction | B*3702 | B44       | Structural prediction | B*3915  | B27       | Structural prediction |
| B*3530 | B07       | Structural prediction | B*3703 | B44       | Structural prediction | B*3916  | B07       | Structural prediction |
| B*3531 | B07       | Structural prediction | B*3704 | B44       | Structural prediction | B*3917  | B07       | Structural prediction |
| B*3532 | B07       | Structural prediction | B*3705 | B44       | Structural prediction | B*3918  | B27       | Structural prediction |
| B*3920 | B07       | Structural prediction | B*4016 | B44       | Structural prediction | B*4050  | B44       | Structural prediction |
| B*3922 | B27       | Structural prediction | B*4018 | B44       | Structural prediction | B*4051  | B44       | Structural prediction |
| B*3923 | B27       | Structural prediction | B*4019 | B44       | Structural prediction | B*4052  | B44       | Structural prediction |
| B*3924 | B27       | Structural prediction | B*4020 | B44       | Structural prediction | B*4053  | B44       | Structural prediction |
| B*3925 | B27       | Structural prediction | B*4021 | B62       | Structural prediction | B*4054  | B44       | Structural prediction |
| B*3926 | B27       | Structural prediction | B*4022 | B44       | Structural prediction | B*4055  | B44       | Structural prediction |
| B*3927 | B27       | Structural prediction | B*4023 | B44       | Structural prediction | B*4056  | B44       | Structural prediction |
| B*3928 | B27       | Structural prediction | B*4024 | B44       | Structural prediction | B*4057  | B44       | Structural prediction |
| B*3929 | B27       | Structural prediction | B*4025 | B44       | Structural prediction | B*4058  | B44       | Structural prediction |
| B*3930 | B27       | Structural prediction | B*4026 | B44       | Structural prediction | B*4059  | B44       | Structural prediction |
| B*3931 | B27       | Structural prediction | B*4027 | B44       | Structural prediction | B*4060  | B44       | Structural prediction |
| B*3932 | B27       | Structural prediction | B*4028 | B44       | Structural prediction | B*4061  | B44       | Structural prediction |
| B*3933 | B27       | Structural prediction | B*4029 | B44       | Structural prediction | B*4101  | B44       | Structural prediction |
| B*3934 | B27       | Structural prediction | B*4030 | B44       | Structural prediction | B*4102  | B44       | Structural prediction |
| B*4001 | B44       | Binding assay         | B*4033 | B44       | Structural prediction | B*4103  | B44       | Structural prediction |
| B*4002 | B44       | Binding assay         | B*4034 | B44       | Structural prediction | B*4104  | B44       | Structural prediction |
| B*4003 | B44       | Structural prediction | B*4035 | B44       | Structural prediction | B*4105  | B44       | Structural prediction |
| B*4004 | B44       | Structural prediction | B*4036 | B44       | Structural prediction | B*4106  | B44       | Structural prediction |
| B*4005 | B44       | Structural prediction | B*4037 | B44       | Structural prediction | B*4107  | B44       | Structural prediction |
| B*4006 | B44       | Published motif       | B*4038 | B44       | Structural prediction | B*4201  | B07       | Binding assay         |
| B*4007 | B44       | Structural prediction | B*4039 | B44       | Structural prediction | B*4202  | B07       | Structural prediction |
| B*4008 | B44       | Structural prediction | B*4040 | B44       | Structural prediction | B*4204  | B07       | Structural prediction |
| B*4009 | B44       | Structural prediction | B*4042 | B44       | Structural prediction | B*4205  | B07       | Structural prediction |
| B*4010 | B44       | Structural prediction | B*4043 | B44       | Structural prediction | B*4206  | B07       | Structural prediction |
| B*4011 | B44       | Structural prediction | B*4044 | B44       | Structural prediction | B*4402  | B44       | Binding assay         |
| B*4012 | B27       | Structural prediction | B*4045 | B44       | Structural prediction | B*4403  | B44       | Binding assay         |
| B*4013 | B44       | Structural prediction | B*4047 | B44       | Structural prediction | B*44031 | B44       | Binding assay         |
| B*4014 | B44       | Structural prediction | B*4048 | B44       | Structural prediction | B*44032 | B44       | Binding assay         |
| B*4015 | B44       | Structural prediction | B*4049 | B44       | Structural prediction | B*4404  | B44       | Published motif       |
| B*4405 | B44       | Structural prediction | B*4436 | B44       | Structural prediction | B*4807  | B27       | Structural prediction |

| Allele | Supertype | Support               | Allele | Supertype | Support               | Allele | Supertype | Support               |
|--------|-----------|-----------------------|--------|-----------|-----------------------|--------|-----------|-----------------------|
| B*4406 | B07       | Structural prediction | B*4437 | B44       | Structural prediction | B*4808 | B27       | Structural prediction |
| B*4407 | B44       | Structural prediction | B*4438 | B44       | Structural prediction | B*4809 | B27       | Structural prediction |
| B*4409 | B44       | Structural prediction | B*4439 | B44       | Structural prediction | B*4810 | B27       | Structural prediction |
| B*4410 | B44       | Structural prediction | B*4440 | B44       | Structural prediction | B*4811 | B27       | Structural prediction |
| B*4411 | B44       | Structural prediction | B*4441 | B44       | Structural prediction | B*4812 | B27       | Structural prediction |
| B*4412 | B44       | Structural prediction | B*4442 | B44       | Structural prediction | B*4813 | B27       | Structural prediction |
| B*4413 | B44       | Structural prediction | B*4501 | B44       | Binding assay         | B*4901 | B44       | Structural prediction |
| B*4414 | B44       | Structural prediction | B*4502 | B44       | Structural prediction | B*4902 | B44       | Structural prediction |
| B*4415 | B44       | Structural prediction | B*4503 | B44       | Structural prediction | B*4904 | B44       | Structural prediction |
| B*4416 | B44       | Structural prediction | B*4504 | B44       | Structural prediction | B*5001 | B44       | Structural prediction |
| B*4417 | B44       | Structural prediction | B*4505 | B44       | Structural prediction | B*5002 | B44       | Structural prediction |
| B*4418 | B44       | Structural prediction | B*4506 | B44       | Structural prediction | B*5004 | B44       | Structural prediction |
| B*4420 | B44       | Structural prediction | B*4507 | B44       | Structural prediction | B*5101 | B07       | Binding assay         |
| B*4421 | B44       | Structural prediction | B*4601 | multiple  | Published motif       | B*5102 | B07       | Published motif       |
| B*4422 | B44       | Structural prediction | B*4602 | multiple  | Structural prediction | B*5103 | B07       | Published motif       |
| B*4423 | B44       | Structural prediction | B*4603 | multiple  | Structural prediction | B*5104 | B07       | Published motif       |
| B*4424 | B44       | Structural prediction | B*4604 | multiple  | Structural prediction | B*5105 | B07       | Published motif       |
| B*4425 | B44       | Structural prediction | B*4605 | multiple  | Structural prediction | B*5106 | B07       | Structural prediction |
| B*4426 | B44       | Structural prediction | B*4701 | B44       | Structural prediction | B*5108 | B07       | Structural prediction |
| B*4427 | B44       | Structural prediction | B*4702 | B44       | Structural prediction | B*5109 | B07       | Structural prediction |
| B*4428 | B44       | Structural prediction | B*4703 | B44       | Structural prediction | B*5110 | B07       | Structural prediction |
| B*4429 | B44       | Structural prediction | B*4704 | B44       | Structural prediction | B*5111 | B07       | Structural prediction |
| B*4430 | B44       | Structural prediction | B*4705 | B44       | Structural prediction | B*5112 | B07       | Structural prediction |
| B*4431 | B44       | Structural prediction | B*4801 | B27       | Structural prediction | B*5113 | B07       | Structural prediction |
| B*4432 | B44       | Structural prediction | B*4802 | B27       | Structural prediction | B*5114 | B07       | Structural prediction |
| B*4433 | B44       | Structural prediction | B*4803 | B27       | Structural prediction | B*5115 | B07       | Structural prediction |
| B*4434 | B44       | Structural prediction | B*4804 | B27       | Structural prediction | B*5116 | B07       | Structural prediction |
| B*4435 | B44       | Structural prediction | B*4805 | B27       | Structural prediction | B*5117 | B07       | Structural prediction |
| B*5118 | B07       | Structural prediction | B*5304 | B07       | Structural prediction | B*5602 | B07       | Published motif       |
| B*5119 | B07       | Structural prediction | B*5305 | B07       | Structural prediction | B*5603 | B07       | Structural prediction |
| B*5120 | B07       | Structural prediction | B*5306 | B07       | Structural prediction | B*5604 | B07       | Structural prediction |
| B*5121 | B07       | Structural prediction | B*5308 | B07       | Structural prediction | B*5605 | B07       | Structural prediction |
| B*5123 | B07       | Structural prediction | B*5309 | B07       | Structural prediction | B*5607 | B07       | Structural prediction |
| B*5124 | B07       | Structural prediction | B*5310 | B07       | Structural prediction | B*5609 | B07       | Structural prediction |
| B*5126 | B07       | Structural prediction | B*5401 | B07       | Binding assay         | B*5610 | B07       | Structural prediction |
| B*5127 | B07       | Structural prediction | B*5403 | B07       | Structural prediction | B*5611 | B07       | Structural prediction |
| B*5128 | B07       | Structural prediction | B*5404 | B07       | Structural prediction | B*5612 | B07       | Structural prediction |
| B*5129 | B07       | Structural prediction | B*5406 | B07       | Structural prediction | B*5613 | B07       | Structural prediction |
| B*5130 | B07       | Structural prediction | B*5407 | B07       | Structural prediction | B*5615 | B07       | Structural prediction |



| Allele | Supertype | Support               | Allele | Supertype | Support               | Allele | Supertype | Support               |
|--------|-----------|-----------------------|--------|-----------|-----------------------|--------|-----------|-----------------------|
| B*5131 | B07       | Structural prediction | B*5501 | B07       | Published motif       | B*5616 | B07       | Structural prediction |
| B*5132 | B07       | Structural prediction | B*5502 | B07       | Published motif       | B*5701 | B58       | Binding assay         |
| B*5133 | B07       | Structural prediction | B*5503 | B07       | Structural prediction | B*5702 | B58       | Published motif       |
| B*5134 | B07       | Structural prediction | B*5504 | B07       | Structural prediction | B*5703 | B58       | Published motif       |
| B*5135 | B07       | Structural prediction | B*5505 | B07       | Structural prediction | B*5704 | B58       | Structural prediction |
| B*5136 | B07       | Structural prediction | B*5507 | B07       | Structural prediction | B*5705 | B58       | Structural prediction |
| B*5137 | B07       | Structural prediction | B*5508 | B07       | Structural prediction | B*5706 | B58       | Structural prediction |
| B*5138 | B07       | Structural prediction | B*5509 | B07       | Structural prediction | B*5707 | B58       | Structural prediction |
| B*5201 | B62       | Published motif       | B*5510 | B07       | Structural prediction | B*5708 | B58       | Structural prediction |
| B*5202 | B62       | Structural prediction | B*5511 | B07       | Structural prediction | B*5709 | B58       | Structural prediction |
| B*5203 | B62       | Structural prediction | B*5512 | B07       | Structural prediction | B*5801 | B58       | Binding assay         |
| B*5204 | B62       | Structural prediction | B*5513 | B07       | Structural prediction | B*5802 | B58       | Binding assay         |
| B*5205 | B62       | Structural prediction | B*5514 | B07       | Structural prediction | B*5804 | B58       | Structural prediction |
| B*5207 | B62       | Structural prediction | B*5515 | B07       | Structural prediction | B*5805 | B58       | Structural prediction |
| B*5208 | B62       | Structural prediction | B*5516 | B07       | Structural prediction | B*5806 | B58       | Structural prediction |
| B*5301 | B07       | Binding assay         | B*5517 | B07       | Structural prediction | B*5807 | B58       | Structural prediction |
| B*5302 | B07       | Structural prediction | B*5519 | B07       | Structural prediction | B*5808 | B58       | Structural prediction |
| B*5303 | B07       | Structural prediction | B*5601 | B07       | Published motif       | B*5809 | B58       | Structural prediction |
| B*5811 | B58       | Structural prediction | B*7804 | B07       | Structural prediction | B*8301 | B07       | Structural prediction |
| B*5901 | B07       | Structural prediction | B*7805 | B62       | Structural prediction | B*9502 | B62       | Structural prediction |
| B*6701 | B07       | Published motif       | B*8101 | B07       | Structural prediction | B*9503 | B27       | Structural prediction |
| B*7301 | B27       | Structural prediction | B*8102 | B07       | Structural prediction | B*9504 | B62       | Structural prediction |
| B*7801 | B07       | Published motif       | B*8201 | B07       | Structural prediction |        |           |                       |
| B*7802 | B07       | Structural prediction | B*8202 | B07       | Structural prediction |        |           |                       |

Multiple: A01, B58 and B62



**Supporting Table S3:** binding motifs for HLA alleles and supertypes

| HLA binding motif                                | supertype binding motif                                          |
|--------------------------------------------------|------------------------------------------------------------------|
| A01: xx[DE]xxxxx[Y]                              | A1: x[TI(SVLM)]xxxxxx[WFY]                                       |
| A02: x[LVMQ(A)]xxxxxx[LV(M)]                     | A2: x[LIVMATQ]xxxxxx[LIVMAT]                                     |
| A03: x[LVM(IAST)]xxxxxx[KYF(R)]                  | A3: x[AILMVST]xxxxxx[RK]                                         |
| A11: xxxxxxxx[KR]                                | A3: x[AILMVST]xxxxxx[RK]                                         |
| A23: xxxxxxxx                                    | A24: x[YF(WIVLMT)]xxxxxx[FI(YWLM)]                               |
| A24: x[YF]xxxxxx[FWIL]                           | A24: x[YF(WIVLMT)]xxxxxx[FI(YWLM)]                               |
| A25: xxxxxxxx                                    | A1: x[TI(SVLM)]xxxxxx[WFY]                                       |
| A26: x[VTILF]xxxxxx[YFML]                        | A1: x[TI(SVLM)]xxxxxx[WFY]                                       |
| A29: x[E(M)]xxxxxx[Y(L)]                         | A1: x[TI(SVLM)]xxxxxx[WFY] or A24: x[YF(WIVLMT)]xxxxxx[FI(YWLM)] |
| A30: x[YFVLI(MT)]xxxxxx[LYM(F)]                  | A1: x[TI(SVLM)]xxxxxx[WFY]                                       |
| A31: xxxxxxxx[R]                                 | A3: x[AILMVST]xxxxxx[RK]                                         |
| A32: xxxxxxxx                                    | A1: x[TI(SVLM)]xxxxxx[WFY]                                       |
| A33: xxxxxxxx[R]                                 | A3: x[AILMVST]xxxxxx[RK]                                         |
| A34: xxxxxxxx                                    | A34: ; A3: x[AILMVST]xxxxxx[RK]                                  |
| A36: xxxxxxxx                                    | A1: x[TI(SVLM)]xxxxxx[WFY]                                       |
| A66: x[TV(APLIC)]xxxxxx[RK]                      | A3: x[AILMVST]xxxxxx[RK]                                         |
| A6801: x[57]xxxxxx[RK]                           | A3: x[AILMVST]xxxxxx[RK]                                         |
| A6802: xxxxxxxx                                  | A2: x[LIVMATQ]xxxxxx[LIVMAT]                                     |
| A74: xxxxxxxx                                    | A1: x[TI(SVLM)]xxxxxx[WFY]                                       |
| A80: xxxxxxxx                                    | A1: x[TI(SVLM)]xxxxxx[WFY]                                       |
| B07: x[P(NDV)]xxxxxx[LF]                         | B7: x[P]xxxxxx[ALIMVFWY]                                         |
| B08: xx[K(RY)]x[KR(H)]xxx[L(FM)]                 | B8: xx[K(RY)]x[KR(H)]xxx[L(FM)]                                  |
| B13: xxxxxxxx                                    | B62: x[QL(IVMP)]xxxxxx[FWY(MIV)]                                 |
| B14: x[RK]xx[RH]xxx[L]                           | B27: x[RQMKH]xxxxxx[LFYRHKILWMV]                                 |
| B1501: x[Q(LMVP)]xxxxxx[YF]                      | B62: x[QL(IVMP)]xxxxxx[FWY(MIV)]                                 |
| B1503: x[QK]xxxxxx[YF]                           | B27: x[RQMKH]xxxxxx[LFYRHKILWMV]                                 |
| B1510: x[H]xxxxxx[L(F)]                          | B27: x[RQMKH]xxxxxx[LFYRHKILWMV]                                 |
| B1516: x[ST(F)]xxxxxx[IVYF(M)]                   | B58: x[AST]xxxxxx[FWY(LIV)]                                      |
| B1517: x[TS]xxxxxx[YFLI]                         | B58: x[AST]xxxxxx[FWY(LIV)]                                      |
| B1518: x[H]xxxxxx[Y(F)]                          | B27: x[RQMKH]xxxxxx[LFYRHKILWMV]                                 |
| B18: x[E]xxxxxx                                  | B44: x[E(D)]xxxxxx[FWYLIMVA]                                     |
| B27: x[RQMK]xxxxxx[LFYRHKILWMV]                  | B27: x[RQMKH]xxxxxx[LFYRHKILWMV]                                 |
| B35: x[P(AVYRDMILF)]xxxxxx[YFML]                 | B7: x[P]xxxxxx[ALIMVFWY]                                         |
| B37: x[DE(HPGSL)]xxxxxx[FML(QKYL)] [IL(TENDQGH)] | B44: x[E(D)]xxxxxx[FWYLIMVA]                                     |
| B38: xxxxxxxx[FL(I)]                             | B27: x[RQMKH]xxxxxx[LFYRHKILWMV]                                 |
| B39: x[KQRH]xxxxxx[L(FVIM)]                      | B27: x[RQMKH]xxxxxx[LFYRHKILWMV]                                 |
| B40: x[E(P)]xxxxxx[LWMATR(V)(AP)]                | B44: x[E(D)]xxxxxx[FWYLIMVA]                                     |
| B41: xxxxxxxx                                    | B44: x[E(D)]xxxxxx[FWYLIMVA]                                     |
| B42: xxxxxxxx                                    | B7: x[P]xxxxxx[ALIMVFWY]                                         |
| B44: x[E(MILVD)]xxxxxx[YF]                       | B44: x[E(D)]xxxxxx[FWYLIMVA]                                     |
| B45: xxxxxxxx                                    | B44: x[E(D)]xxxxxx[FWYLIMVA]                                     |
| B46: x[M(I)]xxxxxx[YF]                           | B62: x[QL(IVMP)]xxxxxx[FWY(MIV)]                                 |
| B49: xxxxxxxx                                    | B44: x[E(D)]xxxxxx[FWYLIMVA]                                     |

| HLA binding motif                | supertype binding motif          |
|----------------------------------|----------------------------------|
| B51: x[APG(WF)]xxxxxx[VIF(WMVL)] | B7: x[P]xxxxxx[ALIMVFWY]         |
| B52: xxxxxxx[IV(MF)][IV(MF)]     | B62: x[QL(IVMP)]xxxxxx[FWY(MIV)] |
| B53: x[P]xxxxxx[WFL]             | B7: x[P]xxxxxx[ALIMVFWY]         |
| B55: x[P]xxxxxx                  | B7: x[P]xxxxxx[ALIMVFWY]         |
| B57: x[ATS]xxxxxx[FWY]           | B58: x[AST]xxxxxx[FWY(LIV)]      |
| B58: x[AST(G)]xxx[R]xx[FW(Y)]    | B58: x[AST]xxxxxx[FWY(LIV)]      |
| Cw01: x[AL][P]xxxx[L]            | no HLA-Cw supertypes             |
| Cw02: x[A]xxxxxx[L]              | no HLA-Cw supertypes             |
| Cw03: x[A]xxxxxx[LFM]            | no HLA-Cw supertypes             |
| Cw04: x[YPF]xxxxxx[LFM]          | no HLA-Cw supertypes             |
| Cw05: x[A]xxxxxx[LF]             | no HLA-Cw supertypes             |
| Cw06: x[ALPRQ]xxxxxx[LIVY]       | no HLA-Cw supertypes             |
| Cw07: x[RHKYPQ]xxxxxx[YFL]       | no HLA-Cw supertypes             |
| Cw08: x[A]xxxxxx[LM]             | no HLA-Cw supertypes             |
| Cw12: x[A]xxxxxx[FWY]            | no HLA-Cw supertypes             |
| Cw14: x[YP]xxxxxx[FWY]           | no HLA-Cw supertypes             |
| Cw15: x[A]xxxxxx[LMYFY]          | no HLA-Cw supertypes             |
| Cw16: x[A]xxxxxx[FWYL]           | no HLA-Cw supertypes             |
| Cw17: x[A]xxxxxx[L]              | no HLA-Cw supertypes             |
| Cw18: x[RQ]xxxxxx[LY]            | no HLA-Cw supertypes             |

**Supporting Table S4:** Associations of epitopes with alternative alleles detected with both algorithms

| pathogen | peptide     | original HLA | alternative | p-value | p-value | q-value |
|----------|-------------|--------------|-------------|---------|---------|---------|
|          |             |              | HLA         | LANL    | MSR     | MSR     |
| HIV      | AENLWVTY    | B44          | B39         | 2.0E-02 | 3.8E-04 | 0.06    |
| HIV      | AENLWVTY    | B44          | B52         | 2.1E-02 | 9.5E-03 | 0.47    |
| HIV      | AEQASQDVKNW | B44          | B53         | 7.1E-05 | 2.2E-05 | 0.00    |
| HIV      | AEQASQDVKNW | B44          | B45         | 2.6E-04 | 1.6E-04 | 0.03    |
| HIV      | AEQASQDVKNW | B44          | B58         | 1.0E-02 | 7.7E-03 | 0.45    |
| HIV      | AIFQSSMTK   | A03 / A11    | A02         | 2.3E-02 | 5.8E-03 | 0.38    |
| HIV      | AIRILQQL    | A02          | A11         | 6.5E-02 | 1.6E-02 | 0.63    |
| HIV      | ALVEICTEM   | A02          | A6801       | 3.1E-02 | 6.9E-03 | 0.44    |
| HIV      | AVDLSHFLK   | A03 / A11    | Cw08        | 1.3E-02 | 3.5E-03 | 0.30    |
| HIV      | AVDLSHFLK   | A03 / A11    | A6801       | 1.0E-02 | 3.5E-03 | 0.30    |
| HIV      | AVDLSHFLK   | A03 / A11    | B07         | 1.3E-02 | 5.5E-03 | 0.38    |
| EBV      | AVFDRKSDAK  | A11          | Cw04        | 1.8E-02 | 4.7E-03 | 0.46    |
| HIV      | AVFIHFKRK   | A03 / A11    | A74         | 6.0E-03 | 3.6E-03 | 0.31    |
| HIV      | AVFIHFKRK   | A03 / A11    | B47         | 1.0E-02 | 7.1E-03 | 0.44    |
| EBV      | AVLLHEESM   | B35          | A31         | 3.3E-02 | 8.0E-03 | 0.54    |
| HIV      | AVRHFPRIW   | B57          | B14         | 7.4E-03 | 3.8E-03 | 0.33    |
| HIV      | AVRHFPRIW   | B57          | B52         | 4.1E-02 | 4.8E-03 | 0.36    |
| HIV      | AVRHFPRIW   | B57          | A6802       | 4.2E-02 | 3.5E-02 | 0.86    |
| EBV      | AYSSWMYSY   | A30          | B49         | 6.3E-02 | 1.8E-02 | 0.72    |
| HIV      | CCFHCQVC    | Cw12         | B45         | 6.1E-02 | 1.7E-02 | 0.67    |
| HIV      | CCFHCQVC    | Cw12         | B55         | 8.7E-02 | 3.0E-02 | 0.81    |
| HIV      | CCFHCQVC    | Cw12         | B14         | 7.9E-02 | 4.6E-02 | 0.92    |
| EBV      | CLGGLTMV    | A02          | B57         | 5.1E-02 | 9.0E-03 | 0.58    |
| HIV      | DCKTILKAL   | B08          | B1503       | 5.7E-03 | 1.2E-04 | 0.03    |
| EBV      | DEVEFLGHY   | B18          | A30         | 9.7E-03 | 2.2E-03 | 0.35    |
| HIV      | DTVLEEMNL   | A6802        | Cw17        | 5.4E-03 | 7.7E-03 | 0.45    |
| HIV      | DTVLEEMNL   | A6802        | A6801       | 2.7E-02 | 9.6E-03 | 0.48    |
| HIV      | DTVLEEMNL   | A6802        | A36         | 6.7E-02 | 4.1E-02 | 0.91    |
| EBV      | DYCNVLNKEF  | A24          | B45         | 5.2E-02 | 1.6E-02 | 0.70    |
| EBV      | DYCNVLNKEF  | A24          | B35         | 6.7E-02 | 4.4E-02 | 1.01    |
| EBV      | EENLLDFVRF  | B44          | B35         | 1.4E-02 | 4.0E-03 | 0.42    |
| EBV      | EGGVGWRHW   | B44          | Cw14        | 1.8E-02 | 9.6E-03 | 0.58    |
| HIV      | EIYKRWII    | B08          | B50         | 4.2E-02 | 4.0E-03 | 0.34    |
| HIV      | EKEGKISKI   | B51          | B49         | 1.6E-02 | 1.2E-03 | 0.16    |
| HIV      | EKEGKISKI   | B51          | Cw15        | 5.2E-02 | 2.2E-02 | 0.73    |
| HIV      | EPVDPRLPEW  | B53          | A25         | 4.5E-02 | 1.9E-02 | 0.71    |
| HIV      | ERILSTYLGR  | A03          | B1517       | 2.0E-02 | 3.7E-03 | 0.32    |
| HIV      | ERYLKDQQL   | B14          | A24         | 6.2E-05 | 6.5E-06 | 0.00    |
| HIV      | ERYLKDQQL   | B14          | A23         | 2.1E-04 | 3.0E-04 | 0.05    |
| HIV      | ETINEEAAEW  | A25          | B53         | 2.1E-03 | 1.3E-03 | 0.16    |
| HIV      | ETINEEAAEW  | A25          | B45         | 2.5E-02 | 1.9E-02 | 0.71    |

| pathogen | peptide     | original HLA | alternative | p-value | p-value | q-value |
|----------|-------------|--------------|-------------|---------|---------|---------|
|          |             |              | HLA         | LANL    | MSR     | MSR     |
| HIV      | EVIPMFSAL   | A26          | B46         | 2.0E-02 | 3.8E-03 | 0.33    |
| HIV      | EVIPMFSAL   | A26          | B08         | 7.1E-02 | 2.4E-02 | 0.73    |
| HIV      | EYRKILRQR   | A33          | B1516       | 4.1E-02 | 1.3E-02 | 0.56    |
| HIV      | FLGKIWPSYK  | A02          | B1517       | 2.6E-02 | 1.1E-02 | 0.51    |
| HIV      | FLGKIWPSYK  | A02          | B58         | 2.2E-02 | 1.1E-02 | 0.51    |
| HIV      | FLGKIWPSYK  | A02          | A31         | 5.3E-02 | 2.3E-02 | 0.73    |
| HIV      | FLKEKGGL    | B08          | B50         | 6.2E-02 | 4.9E-02 | 0.94    |
| EBV      | FLRGRAYGL   | B08          | Cw15        | 5.7E-02 | 2.3E-02 | 0.80    |
| EBV      | FMVFLQTHI   | A02          | B35         | 3.6E-02 | 7.1E-04 | 0.16    |
| HIV      | FPRIWLHGL   | B07 / B81    | B42         | 1.6E-04 | 1.8E-04 | 0.03    |
| HIV      | FPRIWLHGL   | B07 / B81    | B1517       | 2.2E-02 | 2.3E-02 | 0.73    |
| HIV      | FPVTPQVPL   | B07          | A6801       | 1.2E-02 | 8.8E-03 | 0.47    |
| HIV      | FPVTPQVPL   | B07          | Cw01        | 9.2E-02 | 3.9E-02 | 0.90    |
| HIV      | FPVTPQVPLR  | B07          | B45         | 6.3E-02 | 2.1E-02 | 0.73    |
| HIV      | FQTKGLGISY  | B1503        | B58         | 9.0E-03 | 5.5E-03 | 0.37    |
| HIV      | FQTKGLGISY  | B1503        | A74         | 7.4E-02 | 2.2E-02 | 0.73    |
| EBV      | FRKAQIQGL   | B27          | Cw06        | 2.9E-06 | 8.3E-06 | 0.03    |
| EBV      | FRKAQIQGL   | B27          | B50         | 4.6E-02 | 3.4E-03 | 0.41    |
| HIV      | GGKKKYKL    | B08          | Cw15        | 5.2E-02 | 2.1E-02 | 0.73    |
| HIV      | GHQAAMQML   | B39          | B38         | 1.2E-04 | 1.7E-05 | 0.00    |
| HIV      | GHQAAMQML   | B39          | B1510       | 6.0E-03 | 1.2E-03 | 0.15    |
| HIV      | GHQAAMQML   | B39          | A03         | 2.0E-03 | 1.6E-03 | 0.20    |
| HIV      | GLNKIVRMY   | B1501        | Cw15        | 5.2E-02 | 2.0E-02 | 0.72    |
| HIV      | GPGHKARVL   | B07          | B40         | 1.7E-07 | 5.1E-08 | 0.00    |
| HIV      | GPGHKARVL   | B07          | B42         | 3.5E-03 | 7.8E-04 | 0.10    |
| EBV      | GQGGSP TAM  | B1501        | B40         | 7.9E-04 | 2.4E-04 | 0.09    |
| EBV      | GQGGSP TAM  | B1501        | B39         | 4.2E-02 | 2.0E-02 | 0.76    |
| HIV      | GRRGWEALKY  | B27          | A30         | 5.5E-02 | 1.4E-02 | 0.61    |
| HIV      | GRRGWEALKY  | B27          | B1517       | 8.1E-02 | 2.2E-02 | 0.73    |
| EBV      | HHIWQNLL    | B39          | B1510       | 3.2E-03 | 6.2E-04 | 0.15    |
| HIV      | HPDIVIYQY   | B35          | Cw15        | 4.3E-02 | 9.9E-03 | 0.49    |
| HIV      | HPRVSSEVHI  | B07          | A36         | 4.2E-02 | 2.3E-02 | 0.73    |
| HIV      | HPRVSSEVHI  | B07          | A29         | 4.2E-02 | 2.9E-02 | 0.79    |
| HIV      | HPRVSSEVHI  | B07          | B42         | 4.1E-02 | 3.7E-02 | 0.88    |
| EBV      | HPVGEADYFEY | B35          | Cw01        | 8.3E-02 | 1.1E-02 | 0.62    |
| HIV      | HPVHAGPIA   | B07          | B35         | 4.4E-03 | 3.1E-05 | 0.01    |
| HIV      | HPVHAGPIA   | B07          | B55         | 7.9E-04 | 2.8E-04 | 0.05    |
| EBV      | HRCQAIRK    | B27          | B50         | 3.3E-02 | 8.3E-03 | 0.54    |
| EBV      | HRCQAIRK    | B27          | A30         | 3.0E-02 | 1.7E-02 | 0.71    |
| HIV      | HTQGYFPDWQ  | B57          | A29         | 1.9E-03 | 7.9E-04 | 0.10    |
| HIV      | HTQGYFPDWQ  | B57          | B58         | 7.4E-03 | 4.3E-03 | 0.35    |
| HIV      | HTQGYFPDWQ  | B57          | B49         | 9.7E-02 | 3.8E-02 | 0.89    |
| EBV      | IEDPPFNSL   | B40          | B45         | 5.4E-02 | 1.5E-02 | 0.68    |

| pathogen | peptide     | original HLA | alternative | p-value | p-value | q-value |
|----------|-------------|--------------|-------------|---------|---------|---------|
|          |             |              | HLA         | LANL    | MSR     | MSR     |
| HIV      | IEELRQHLL   | B40          | B37         | 1.3E-04 | 1.9E-05 | 0.00    |
| HIV      | IEELRQHLL   | B40          | A74         | 1.3E-02 | 1.9E-02 | 0.71    |
| HIV      | IEELRQHLL   | B40          | B1517       | 2.1E-02 | 1.9E-02 | 0.71    |
| HIV      | IEIKDTKEAL  | B40          | B08         | 8.9E-06 | 2.7E-06 | 0.00    |
| EBV      | ILYNGWYA    | A02          | B35         | 1.5E-02 | 8.0E-06 | 0.03    |
| HIV      | ILKEPVHGV   | A02          | B50         | 2.5E-02 | 3.0E-02 | 0.81    |
| HIV      | ILKEPVHGVY  | B1501        | B1503       | 8.1E-03 | 4.4E-02 | 0.92    |
| EBV      | IPQCRLTPL   | B07          | A31         | 3.1E-02 | 7.9E-03 | 0.54    |
| EBV      | IPQCRLTPL   | B07          | Cw05        | 4.3E-02 | 1.6E-02 | 0.70    |
| HIV      | IPRRIRQGL   | B07          | B42         | 4.3E-03 | 2.9E-03 | 0.29    |
| HIV      | IRLRPGGKK   | B27          | B58         | 9.6E-03 | 6.3E-03 | 0.39    |
| HIV      | IRLRPGGKK   | B27          | Cw17        | 1.1E-02 | 7.9E-03 | 0.46    |
| HIV      | IRLRPGGKK   | B27          | B37         | 3.3E-02 | 9.2E-03 | 0.47    |
| HIV      | ISKKAKGWF   | B57          | B58         | 5.1E-02 | 5.3E-03 | 0.37    |
| HIV      | ISKKAKGWF   | B57          | A36         | 2.0E-02 | 3.3E-02 | 0.85    |
| HIV      | ISPRTLNAW   | B57          | B1516       | 1.3E-02 | 7.4E-03 | 0.45    |
| HIV      | ISPRTLNAW   | B57          | A6802       | 4.3E-02 | 5.0E-02 | 0.94    |
| HIV      | ITLWQRPLV   | A6802 / A74  | A29         | 5.2E-03 | 2.1E-04 | 0.03    |
| HIV      | ITLWQRPLV   | A6802 / A74  | B1517       | 6.4E-02 | 4.0E-02 | 0.90    |
| HIV      | IVLPEKDSW   | B57          | B58         | 2.6E-04 | 5.4E-05 | 0.02    |
| HIV      | IVNRNRQGY   | A30          | Cw08        | 1.9E-02 | 1.8E-03 | 0.22    |
| HIV      | IVNRNRQGY   | A30          | B27         | 4.1E-03 | 2.6E-03 | 0.27    |
| HIV      | IVNRNRQGY   | A30          | B07         | 8.2E-03 | 3.6E-03 | 0.32    |
| EBV      | IVTDFSVIK   | A11          | Cw04        | 9.3E-03 | 6.6E-03 | 0.53    |
| EBV      | IVTDFSVIK   | A11          | B1501       | 6.9E-02 | 2.3E-02 | 0.79    |
| HIV      | IYQEPFKNLK  | A11          | A24         | 1.5E-05 | 2.3E-06 | 0.00    |
| HIV      | IYQEPFKNLK  | A11          | A23         | 2.3E-03 | 3.2E-03 | 0.30    |
| HIV      | IYQEPFKNLK  | A11          | B07         | 4.3E-02 | 2.0E-02 | 0.72    |
| HIV      | KAADVLSHFL  | Cw08         | Cw03        | 3.4E-04 | 1.1E-04 | 0.03    |
| HIV      | KAADVLSHFL  | Cw08         | A74         | 8.6E-03 | 7.1E-03 | 0.44    |
| HIV      | KAADVLSHFL  | Cw08         | B46         | 3.5E-02 | 9.2E-03 | 0.47    |
| HIV      | KAFSPEVIPMF | B57          | Cw14        | 7.8E-03 | 2.1E-03 | 0.23    |
| HIV      | KAVRLIKFLY  | B57 / B58    | A29         | 2.5E-02 | 7.0E-03 | 0.44    |
| HIV      | KAVRLIKFLY  | B57 / B58    | B13         | 4.6E-02 | 3.2E-02 | 0.84    |
| HIV      | KAVRLIKFLY  | B57 / B58    | B07         | 2.0E-02 | 4.1E-02 | 0.91    |
| EBV      | KEHVIQNAF   | B44          | Cw17        | 2.6E-03 | 2.3E-03 | 0.35    |
| HIV      | KEKGGLEGL   | B40          | B49         | 5.8E-07 | 1.5E-07 | 0.00    |
| HIV      | KEKGGLEGL   | B40          | Cw15        | 4.4E-02 | 1.7E-02 | 0.66    |
| HIV      | KIRLRPGGK   | A03          | B27         | 6.7E-03 | 3.9E-03 | 0.33    |
| HIV      | KIRLRPGGK   | A03          | A02         | 1.0E-02 | 2.9E-02 | 0.79    |
| HIV      | KLNWASQIY   | A30          | B58         | 4.4E-02 | 1.4E-02 | 0.60    |
| HIV      | KLNWASQIY   | A30          | A6801       | 3.3E-02 | 2.3E-02 | 0.73    |
| HIV      | KLVDFRELNK  | A03          | B1510       | 2.0E-02 | 3.7E-03 | 0.32    |

| pathogen | peptide      | original HLA     | alternative | p-value | p-value | q-value |
|----------|--------------|------------------|-------------|---------|---------|---------|
|          |              |                  | HLA         | LANL    | MSR     | MSR     |
| HIV      | KQNPDIVIY    | A30              | A6801       | 9.2E-04 | 6.0E-04 | 0.09    |
| HIV      | KQNPDIVIY    | A30              | B39         | 4.3E-02 | 2.4E-02 | 0.73    |
| HIV      | KRWILGLNK    | B27              | B35         | 1.8E-03 | 1.0E-04 | 0.03    |
| HIV      | KRWILGLNK    | B27              | B45         | 6.5E-02 | 2.1E-02 | 0.72    |
| HIV      | KTAVQMAVF    | B57              | B81         | 1.8E-02 | 1.2E-02 | 0.55    |
| HIV      | KTKPPLPSVKK  | A03              | B42         | 4.8E-04 | 2.4E-04 | 0.04    |
| HIV      | KTKPPLPSVKK  | A03              | A31         | 3.1E-02 | 4.5E-04 | 0.08    |
| HIV      | KYCWNLLQY    | A30              | B1517       | 2.1E-02 | 2.1E-02 | 0.73    |
| HIV      | KYKCLKHIVW   | A24              | A23         | 1.5E-03 | 1.1E-03 | 0.15    |
| HIV      | KYKCLKHIVW   | A24              | Cw01        | 3.3E-02 | 1.0E-02 | 0.49    |
| HIV      | LADQLIHLHY   | B18              | Cw05        | 7.1E-03 | 5.3E-03 | 0.37    |
| EBV      | LDFVRFMGV    | B37              | B35         | 9.6E-04 | 2.0E-04 | 0.08    |
| EBV      | LEKARGSTY    | B1501            | A23         | 1.6E-03 | 3.9E-04 | 0.13    |
| EBV      | LEKARGSTY    | B1501            | B40         | 1.7E-03 | 6.4E-04 | 0.15    |
| HIV      | LFCASDAKAY   | A24              | B39         | 4.0E-02 | 2.2E-03 | 0.24    |
| HIV      | LFCASDAKAY   | A24              | B82         | 4.0E-02 | 7.4E-03 | 0.45    |
| EBV      | LIPETVPYI    | A02              | A80         | 2.6E-02 | 3.8E-03 | 0.41    |
| EBV      | LLDFVRFMGV   | A02              | B45         | 4.5E-02 | 1.7E-02 | 0.71    |
| EBV      | LLSAWILTA    | A02              | A80         | 4.1E-02 | 4.1E-03 | 0.42    |
| EBV      | LLSAWILTA    | A02              | B45         | 1.2E-02 | 6.3E-03 | 0.50    |
| EBV      | LLWAARPR     | A02              | B35         | 6.8E-02 | 7.5E-05 | 0.03    |
| EBV      | LLWAARPR     | A02              | A80         | 2.8E-02 | 9.6E-03 | 0.58    |
| EBV      | LLWTLVLL     | A02              | B14         | 4.3E-02 | 1.4E-02 | 0.68    |
| EBV      | LMIPLINV     | A02              | B27         | 1.9E-02 | 2.3E-03 | 0.35    |
| HIV      | LPCRQII      | B51              | B1516       | 4.0E-02 | 1.0E-02 | 0.49    |
| HIV      | LPCRQII      | B51              | B39         | 4.0E-02 | 1.7E-02 | 0.66    |
| EBV      | LPCVLPV      | B07              | B45         | 2.6E-04 | 7.2E-05 | 0.03    |
| EBV      | LPCVLPV      | B07              | B46         | 1.1E-02 | 8.8E-04 | 0.18    |
| EBV      | LRGKWRRYR    | B27              | A23         | 1.5E-02 | 4.6E-03 | 0.46    |
| EBV      | LRGKWRRYR    | B27              | A30         | 5.2E-02 | 4.2E-02 | 1.01    |
| EBV      | LTAGFLIFL    | A02              | B45         | 4.4E-02 | 1.5E-02 | 0.68    |
| HIV      | LVGKLNWASQIY | B1501            | B39         | 5.7E-03 | 1.2E-03 | 0.15    |
| HIV      | LVGKLNWASQIY | B1501            | A30         | 3.6E-02 | 2.3E-03 | 0.25    |
| HIV      | LVGKLNWASQIY | B1501            | A6801       | 9.3E-02 | 1.3E-02 | 0.57    |
| HIV      | PIKETWETW    | A32              | A24         | 2.0E-03 | 4.8E-05 | 0.01    |
| HIV      | PLRPMTYK     | A11              | A34         | 4.0E-02 | 9.9E-03 | 0.49    |
| HIV      | PLRPMTYK     | A11              | B1517       | 3.9E-02 | 1.7E-02 | 0.66    |
| HIV      | QAISPRTLNAW  | A25              | B57         | 7.3E-05 | 3.8E-05 | 0.01    |
| HIV      | QAISPRTLNAW  | A25              | B53         | 9.2E-03 | 2.2E-02 | 0.73    |
| HIV      | QAISPRTLNAW  | A25              | B58         | 2.6E-02 | 3.7E-02 | 0.88    |
| EBV      | QAKWRLQTL    | B08              | B45         | 5.6E-02 | 1.8E-02 | 0.71    |
| EBV      | QAKWRLQTL    | B08              | A33         | 5.2E-02 | 3.5E-02 | 0.94    |
| HIV      | QASQEVKNW    | B53 / B57 / Cw04 | B58         | 1.8E-04 | 7.7E-05 | 0.03    |

| pathogen | peptide     | original HLA | alternative | p-value | p-value | q-value |
|----------|-------------|--------------|-------------|---------|---------|---------|
|          |             |              | HLA         | LANL    | MSR     | MSR     |
| HIV      | QELKNSAVSL  | B40          | A32         | 1.7E-02 | 1.2E-03 | 0.15    |
| HIV      | QIYAGIKVK   | A11 / A03    | B1517       | 4.1E-02 | 4.9E-03 | 0.36    |
| HIV      | QIYAGIKVK   | A11 / A03    | B18         | 4.1E-02 | 2.2E-02 | 0.73    |
| HIV      | QIYPGIKVR   | A03 / A11    | B14         | 6.9E-03 | 3.2E-03 | 0.30    |
| HIV      | QIYPGIKVR   | A03 / A11    | B1517       | 4.0E-02 | 4.0E-03 | 0.34    |
| HIV      | QIYPGIKVR   | A03 / A11    | B18         | 4.0E-02 | 1.8E-02 | 0.68    |
| EBV      | QPRAPIRPI   | B07          | B35         | 1.3E-02 | 1.2E-02 | 0.62    |
| EBV      | QPRAPIRPI   | B07          | B57         | 6.4E-02 | 2.5E-02 | 0.81    |
| HIV      | QVPLRPMTYK  | A03 / A11    | A34         | 1.4E-04 | 2.8E-05 | 0.01    |
| HIV      | QVPLRPMTYK  | A03 / A11    | B14         | 3.3E-02 | 2.6E-02 | 0.75    |
| HIV      | RAIEAQQHL   | Cw03 / Cw15  | B58         | 3.7E-03 | 6.7E-04 | 0.10    |
| HIV      | RAIEAQQHL   | Cw03 / Cw15  | A25         | 4.4E-02 | 1.6E-02 | 0.65    |
| HIV      | RDYVDRFFKTL | A24          | B1510       | 3.7E-03 | 5.4E-03 | 0.37    |
| HIV      | RDYVDRFFKTL | A24          | A74         | 1.0E-02 | 7.8E-03 | 0.46    |
| HIV      | RDYVDRFFKTL | A24          | B57         | 1.0E-02 | 9.2E-03 | 0.47    |
| HIV      | RDYVDRFFKTL | A24          | B41         | 8.9E-03 | 1.2E-02 | 0.55    |
| HIV      | RDYVDRFYKTL | B44          | B1510       | 3.7E-03 | 5.9E-03 | 0.38    |
| HIV      | RDYVDRFYKTL | B44          | A74         | 1.0E-02 | 1.0E-02 | 0.51    |
| HIV      | RDYVDRFYKTL | B44          | B57         | 1.0E-02 | 1.4E-02 | 0.61    |
| HIV      | RIKQIINMW   | A32          | A29         | 4.9E-03 | 2.0E-03 | 0.23    |
| HIV      | RIKQIINMW   | A32          | A30         | 2.0E-02 | 6.0E-03 | 0.38    |
| EBV      | RKIYDLIEL   | B27          | A30         | 3.1E-03 | 1.6E-03 | 0.22    |
| HIV      | RLRDLLIVTR  | A03 / A31    | B39         | 3.3E-02 | 4.5E-03 | 0.35    |
| HIV      | RLRDLLIVTR  | A03 / A31    | B07         | 1.0E-02 | 1.4E-02 | 0.58    |
| HIV      | RLRDLLIVTR  | A03 / A31    | B58         | 3.3E-02 | 4.5E-02 | 0.92    |
| HIV      | RLRPGGKKKY  | A03          | Cw06        | 8.5E-03 | 3.3E-03 | 0.30    |
| HIV      | RLRPGGKKKY  | A03          | B1501       | 1.7E-02 | 1.1E-02 | 0.54    |
| HIV      | RLRPGGKKKY  | A03          | B1516       | 8.5E-02 | 1.5E-02 | 0.63    |
| HIV      | RLRPGGKKKY  | A03          | A80         | 8.5E-02 | 4.7E-02 | 0.92    |
| HIV      | RMRGAHTNDVK | A03          | Cw07        | 3.5E-02 | 9.5E-03 | 0.47    |
| HIV      | RPMTYKAAL   | B07          | B42         | 4.3E-03 | 2.9E-03 | 0.29    |
| HIV      | RPMTYKAAL   | B07          | A24         | 1.1E-02 | 4.0E-03 | 0.34    |
| HIV      | RPMTYKAAL   | B07          | A32         | 1.3E-02 | 8.7E-03 | 0.47    |
| HIV      | RPMTYKAAV   | B07          | B39         | 2.1E-02 | 4.4E-03 | 0.35    |
| HIV      | RPMTYKAAV   | B07          | B42         | 9.2E-03 | 4.9E-03 | 0.36    |
| HIV      | RPNNNTRKSI  | B07          | B42         | 6.1E-02 | 1.8E-02 | 0.69    |
| EBV      | RPPIFIRRL   | B07          | Cw02        | 2.0E-03 | 6.0E-04 | 0.15    |
| EBV      | RPPIFIRRL   | B07          | Cw17        | 3.8E-02 | 3.1E-02 | 0.90    |
| EBV      | RPQKRPSCI   | B07          | B42         | 4.1E-02 | 1.2E-02 | 0.62    |
| EBV      | RRARSLAERY  | B27          | B50         | 3.1E-02 | 7.5E-03 | 0.54    |
| EBV      | RRARSLAERY  | B27          | A30         | 2.7E-02 | 1.5E-02 | 0.68    |
| EBV      | RRIFDLIEL   | B27          | B14         | 4.4E-02 | 1.2E-02 | 0.62    |
| EBV      | RRIFDLIEL   | B27          | A23         | 4.3E-02 | 2.7E-02 | 0.83    |



| pathogen | peptide     | original HLA | alternative | p-value | p-value | q-value |
|----------|-------------|--------------|-------------|---------|---------|---------|
|          |             |              | HLA         | LANL    | MSR     | MSR     |
| EBV      | RRIYDLIEL   | B27          | A30         | 6.8E-03 | 5.0E-03 | 0.49    |
| EBV      | RRIYDLIEL   | B27          | B57         | 3.5E-02 | 2.0E-02 | 0.76    |
| EBV      | RRRWRLTV    | B27          | A31         | 1.1E-02 | 9.6E-04 | 0.19    |
| EBV      | RRRWRLTV    | B27          | B45         | 6.6E-03 | 3.0E-03 | 0.38    |
| HIV      | RRWIQLGLQK  | B27          | B35         | 3.8E-05 | 1.7E-06 | 0.00    |
| HIV      | RRWIQLGLQK  | B27          | B18         | 2.2E-02 | 5.1E-03 | 0.36    |
| HIV      | RRWIQLGLQK  | B27          | A30         | 5.0E-02 | 2.2E-02 | 0.73    |
| HIV      | RSLYNTVATLY | A30          | A02         | 3.2E-03 | 2.3E-03 | 0.26    |
| HIV      | RSLYNTVATLY | A30          | A29         | 8.1E-03 | 5.4E-03 | 0.37    |
| HIV      | RVKEKYQHL   | B08          | A36         | 2.0E-02 | 3.7E-03 | 0.32    |
| EBV      | RVRAYTYSK   | A03          | A30         | 7.9E-05 | 4.8E-05 | 0.03    |
| EBV      | RVRAYTYSK   | A03          | A80         | 4.4E-02 | 2.2E-02 | 0.79    |
| HIV      | RYLKDQQLL   | A24          | A23         | 1.6E-06 | 1.1E-06 | 0.00    |
| HIV      | RYLKDQQLL   | A24          | B42         | 6.9E-02 | 1.3E-02 | 0.57    |
| HIV      | RYLKDQQLL   | A24          | B08         | 7.1E-02 | 2.5E-02 | 0.73    |
| HIV      | RYPLTFGW    | A24          | B53         | 2.2E-03 | 9.7E-04 | 0.13    |
| HIV      | RYPLTFGW    | A24          | B35         | 4.9E-03 | 9.1E-03 | 0.47    |
| HIV      | RYPLTFGW    | A24          | A23         | 6.2E-03 | 2.0E-02 | 0.72    |
| EBV      | RYSIFFDY    | A24          | Cw17        | 1.0E-02 | 6.0E-03 | 0.50    |
| HIV      | SAEPVPLQL   | B14 / Cw05   | Cw01        | 3.2E-02 | 9.5E-03 | 0.47    |
| HIV      | SAEPVPLQL   | B14 / Cw05   | B1510       | 4.1E-02 | 2.4E-02 | 0.73    |
| HIV      | SAEPVPLQL   | B14 / Cw05   | B07         | 4.0E-02 | 5.0E-02 | 0.94    |
| HIV      | SEGATPQDL   | B40          | B44         | 2.4E-05 | 8.1E-06 | 0.00    |
| HIV      | SFEPIPIHY   | A29          | A30         | 1.9E-02 | 5.1E-03 | 0.36    |
| HIV      | SFNCGGEFF   | B1516 / Cw04 | A29         | 1.3E-02 | 2.8E-03 | 0.29    |
| HIV      | SFNCGGEFF   | B1516 / Cw04 | B18         | 5.3E-02 | 7.1E-03 | 0.44    |
| HIV      | SLLNATDIAV  | A02          | B37         | 2.0E-02 | 5.3E-04 | 0.09    |
| EBV      | SLVIVTTFV   | A02          | A80         | 4.1E-02 | 1.7E-02 | 0.71    |
| HIV      | SLYNTVATL   | A02          | Cw06        | 3.2E-02 | 8.8E-03 | 0.47    |
| HIV      | SPAIFQSSM   | B07          | B42         | 3.0E-02 | 1.4E-02 | 0.59    |
| HIV      | SPAIFQSSM   | B07          | B82         | 3.2E-02 | 1.5E-02 | 0.61    |
| HIV      | SPAIFQSSM   | B07          | B81         | 2.4E-02 | 1.8E-02 | 0.69    |
| HIV      | SPRTLNAWV   | B07          | B42         | 1.2E-03 | 6.8E-04 | 0.10    |
| HIV      | SPRTLNAWV   | B07          | B81         | 4.2E-02 | 1.2E-02 | 0.55    |
| HIV      | SPRTLNAWV   | B07          | B39         | 4.1E-02 | 2.0E-02 | 0.72    |
| HIV      | SVITQACPK   | A11          | A32         | 6.3E-02 | 2.0E-02 | 0.72    |
| HIV      | SVITQACPK   | A11          | B42         | 2.8E-02 | 2.1E-02 | 0.73    |
| EBV      | SVRDLARL    | A02          | B45         | 4.3E-02 | 2.7E-03 | 0.38    |
| EBV      | SVRDLARL    | A02          | B81         | 4.0E-03 | 5.9E-03 | 0.50    |
| HIV      | TAFTIPSI    | B51          | B35         | 9.4E-04 | 1.4E-05 | 0.00    |
| HIV      | TAFTIPSI    | B51          | B40         | 3.0E-04 | 1.3E-04 | 0.03    |
| HIV      | TAVPWNASW   | B35          | A01         | 4.1E-02 | 2.7E-02 | 0.76    |
| HIV      | TAVPWNASW   | B35          | B55         | 9.0E-02 | 3.6E-02 | 0.87    |

| pathogen | peptide     | original HLA          | alternative | p-value | p-value | q-value |
|----------|-------------|-----------------------|-------------|---------|---------|---------|
|          |             |                       | HLA         | LANL    | MSR     | MSR     |
| HIV      | TLYCVHQRI   | A11                   | B1516       | 4.1E-02 | 1.2E-02 | 0.55    |
| HIV      | TLYCVHQRI   | A11                   | B1517       | 4.0E-02 | 2.0E-02 | 0.72    |
| HIV      | TPGPGVRYPL  | B07 / B42             | B58         | 2.1E-02 | 6.2E-03 | 0.39    |
| HIV      | TPQDLNTML   | B07 / B42 / B53 / B81 | B14         | 3.3E-04 | 1.4E-04 | 0.03    |
| HIV      | TPQDLNTML   | B07 / B42 / B53 / B81 | B27         | 7.0E-02 | 1.8E-02 | 0.68    |
| HIV      | TPQDLNTML   | B07 / B42 / B53 / B81 | B39         | 4.6E-02 | 2.3E-02 | 0.73    |
| HIV      | TPQVPLRPM   | B07                   | B42         | 2.4E-06 | 5.4E-07 | 0.00    |
| HIV      | TPQVPLRPM   | B07                   | B82         | 2.3E-02 | 4.4E-03 | 0.35    |
| HIV      | TPQVPLRPM   | B07                   | B39         | 2.3E-02 | 4.5E-03 | 0.35    |
| HIV      | TPYDINQML   | B07 / B42 / B53 / B81 | B35         | 2.1E-02 | 5.0E-03 | 0.36    |
| HIV      | TQGYFPDWQNY | B1501                 | A29         | 1.3E-04 | 1.4E-05 | 0.00    |
| HIV      | TQGYFPDWQNY | B1501                 | A23         | 1.3E-04 | 1.0E-04 | 0.03    |
| HIV      | TQGYFPDWQNY | B1501                 | A25         | 4.8E-02 | 1.5E-02 | 0.61    |
| HIV      | TSTLQEQIGW  | B57 / B58             | Cw01        | 3.3E-02 | 8.6E-03 | 0.47    |
| HIV      | TVLDVGDAY   | B35                   | B1516       | 4.3E-02 | 1.3E-02 | 0.57    |
| HIV      | TVLDVGDAY   | B35                   | B07         | 1.4E-02 | 2.3E-02 | 0.73    |
| HIV      | TVYYGVPVWK  | A03                   | B39         | 4.5E-02 | 8.2E-03 | 0.47    |
| HIV      | TVYYGVPVWK  | A03                   | B53         | 2.6E-02 | 8.7E-03 | 0.47    |
| HIV      | TVYYGVPVWK  | A03                   | A30         | 1.6E-02 | 2.4E-02 | 0.73    |
| EBV      | TYGPFMCL    | A24                   | B45         | 1.3E-02 | 9.0E-03 | 0.58    |
| EBV      | TYSAGIVQI   | A24                   | A31         | 4.3E-02 | 1.2E-02 | 0.62    |
| EBV      | VEITPYKPTW  | B44                   | B35         | 1.6E-03 | 4.6E-03 | 0.46    |
| HIV      | VIYQYMDDL   | A02                   | B58         | 9.1E-02 | 4.2E-03 | 0.35    |
| HIV      | VLEWRFSRL   | A02                   | B1517       | 3.9E-02 | 1.7E-02 | 0.66    |
| EBV      | VLQWASLAV   | A02                   | B35         | 4.1E-02 | 1.5E-05 | 0.03    |
| EBV      | VMNSNTLLSAW | A25                   | B35         | 5.2E-02 | 4.4E-02 | 1.01    |
| EBV      | VPGSETMCY   | B35                   | B13         | 4.8E-02 | 4.1E-02 | 1.01    |
| HIV      | VPVWKEATTT  | B55                   | Cw04        | 1.2E-02 | 2.4E-03 | 0.26    |
| HIV      | VPVWKEATTTL | B35                   | A23         | 1.5E-04 | 1.6E-05 | 0.00    |
| HIV      | VPVWKEATTTL | B35                   | B53         | 2.2E-02 | 4.8E-02 | 0.93    |
| HIV      | WASRELERF   | B35                   | B53         | 5.1E-05 | 1.8E-04 | 0.03    |
| HIV      | WASRELERF   | B35                   | B18         | 2.2E-02 | 5.4E-03 | 0.37    |
| HIV      | WPTVRERM    | B08                   | B50         | 2.0E-02 | 4.0E-03 | 0.34    |
| EBV      | WTLVVLLI    | B1516                 | A24         | 1.3E-03 | 1.1E-03 | 0.19    |
| HIV      | YFPDWQNYT   | B37 / B57             | A29         | 1.2E-03 | 2.0E-03 | 0.23    |
| HIV      | YFPDWQNYT   | B37 / B57             | A23         | 8.6E-03 | 2.5E-03 | 0.26    |
| HIV      | YLKDQQLL    | B08                   | A23         | 4.8E-04 | 2.0E-03 | 0.23    |
| HIV      | YLKDQQLL    | B08                   | B1501       | 9.8E-02 | 1.1E-02 | 0.51    |
| HIV      | YLKDQQLL    | B08                   | B45         | 8.8E-02 | 4.3E-02 | 0.91    |
| EBV      | YLLEMLWRL   | A02                   | A11         | 9.5E-03 | 1.8E-04 | 0.08    |
| EBV      | YPLHEQYGM   | B35                   | A80         | 7.3E-04 | 1.0E-04 | 0.04    |
| HIV      | YPLTFGWCY   | B18                   | B53         | 1.7E-06 | 3.8E-06 | 0.00    |
| HIV      | YPLTFGWCY   | B18                   | B35         | 3.9E-04 | 4.8E-05 | 0.01    |

| <b>pathogen</b> | <b>peptide</b> | <b>original HLA</b> | <b>alternative<br/>HLA</b> | <b>p-value<br/>LANL</b> | <b>p-value<br/>MSR</b> | <b>q-value<br/>MSR</b> |
|-----------------|----------------|---------------------|----------------------------|-------------------------|------------------------|------------------------|
| HIV             | YPLTFGWCY      | B18                 | B42                        | 6.0E-02                 | 3.9E-02                | 0.90                   |
| EBV             | YRSGIIAVV      | Cw06                | B40                        | 4.0E-03                 | 3.4E-03                | 0.41                   |
| HIV             | YTAFTIPSI      | A02                 | B35                        | 1.5E-02                 | 9.0E-04                | 0.12                   |
| EBV             | YVLDHLIVV      | A02                 | Cw04                       | 5.1E-02                 | 2.4E-02                | 0.81                   |

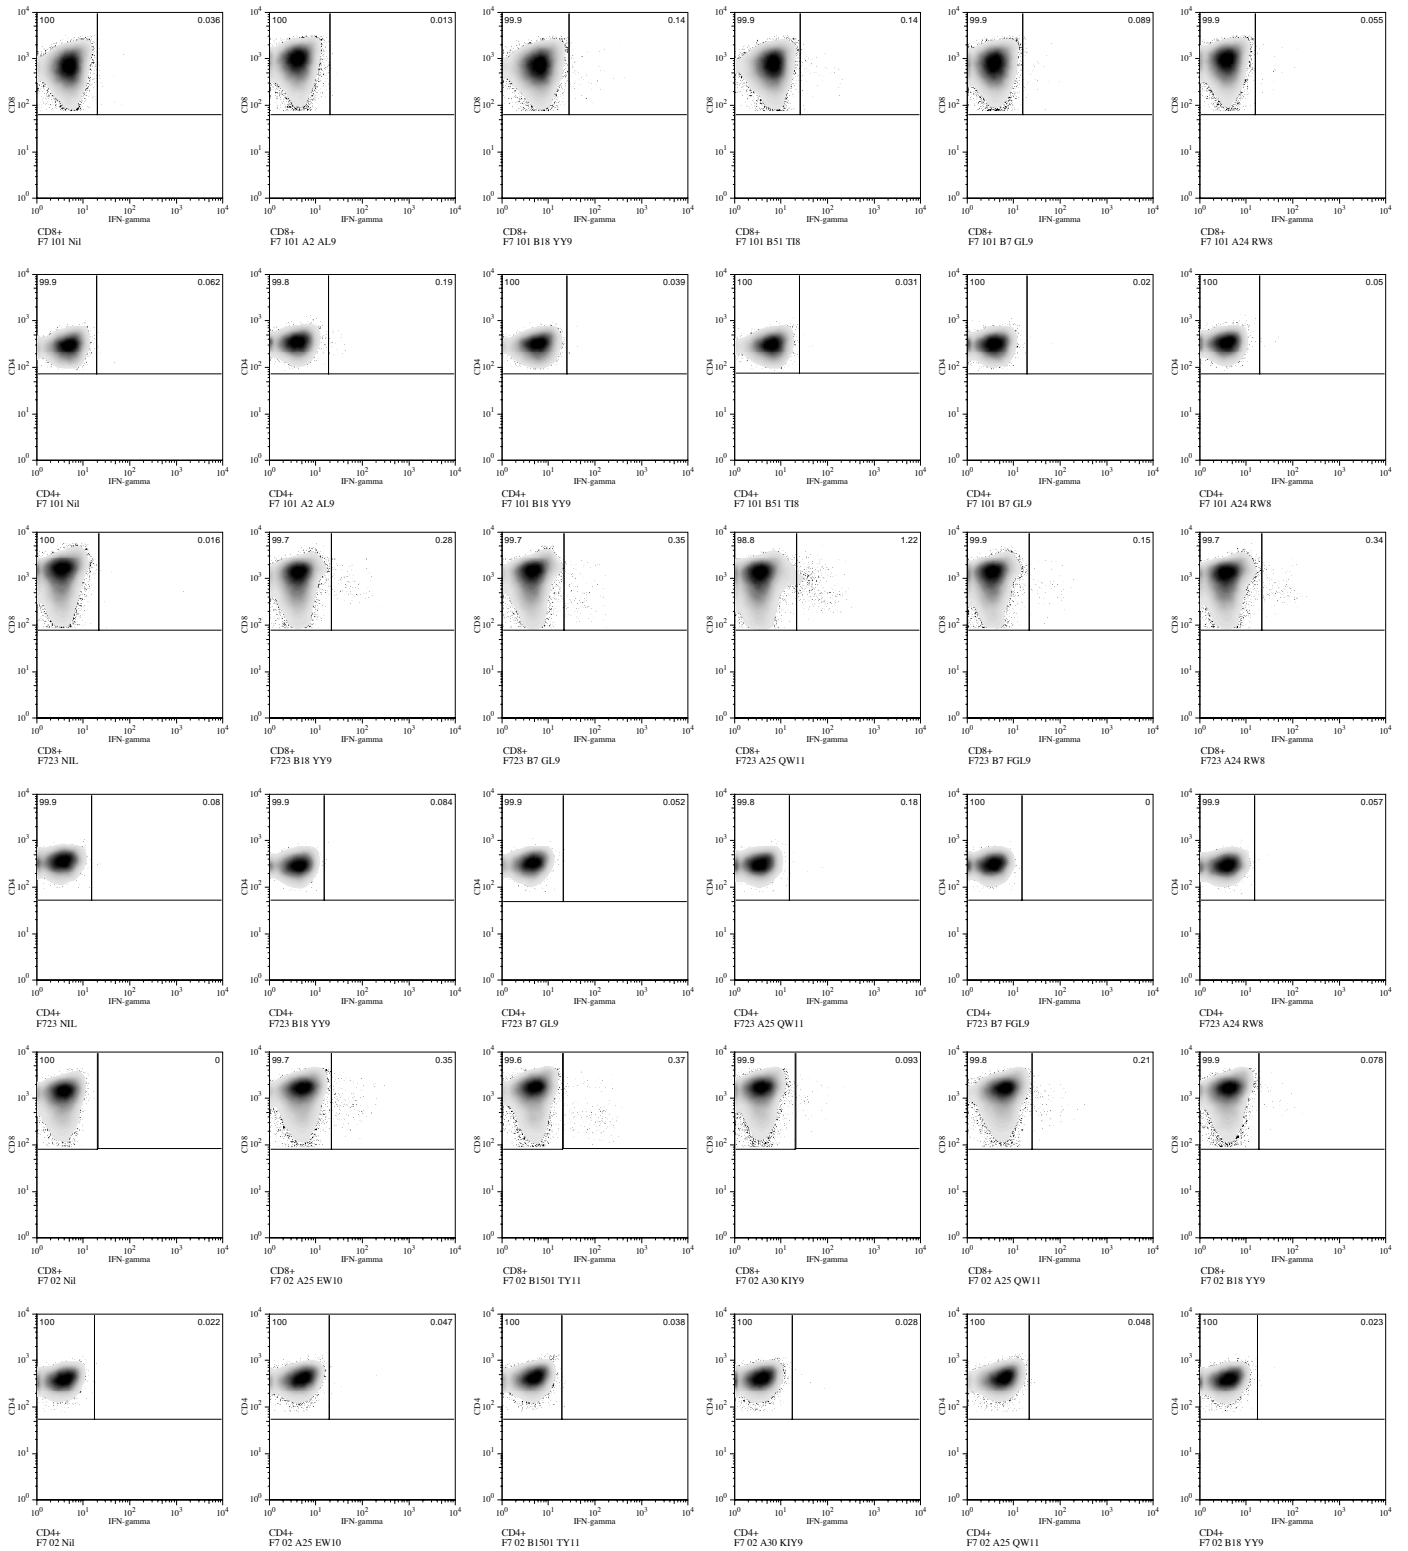

**Frahm et al. Supporting Fig. S1:** Flow-cytometric analysis of IFN- $\gamma$ -producing cells. Epitope-specific T cells in six subjects detected in the absence of the original restricting allele were analyzed for the expression of CD4 or CD8. Each subject is represented in two rows. Upper rows are gated on CD3+ CD8+ T cells, lower rows on CD3+ CD4+ T cells. Left graphs are negative controls stimulated in the absence of peptide (Nil), subjects and peptides are marked underneath each graph.

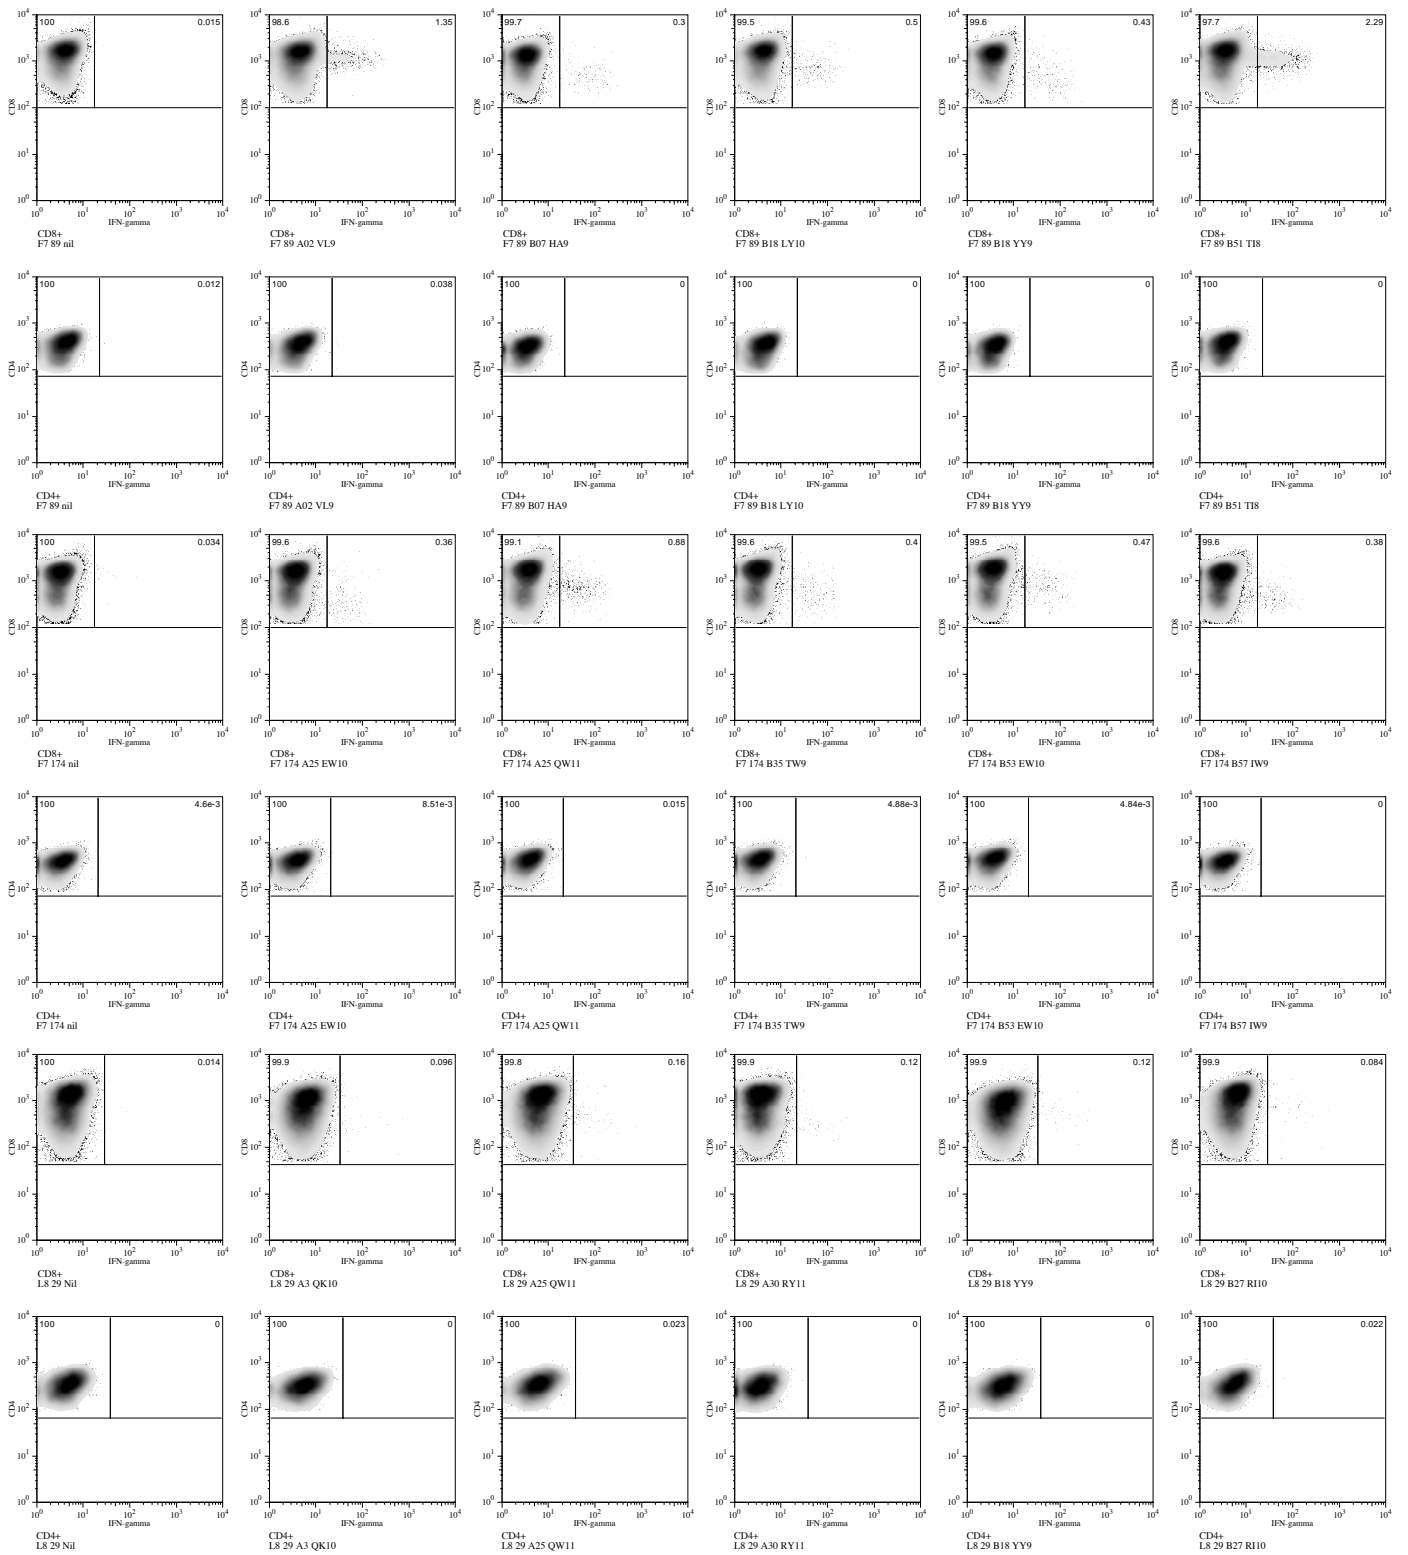

Frahm et al. Supporting Fig. S1 cont
